## **Direct and indirect neurogenesis generate a mosaic of distinct glutamatergic projection neuron types and cortical subnetworks**

Dhananjay Huilgol<sup>1,3</sup>, Jesse M Levine<sup>3,4</sup>, William Galbavy<sup>3,5</sup>, Bor-Shuen Wang<sup>3</sup>, Miao He<sup>3,6</sup>  
Shreyas M Suryanarayana<sup>1</sup>, Z. Josh Huang<sup>1,2,3\*</sup>

<sup>1</sup>Department of Neurobiology, Duke University Medical Center, Durham, NC 27710, USA

<sup>2</sup>Department of Biomedical Engineering, Duke University, Durham, NC 27708, USA

<sup>3</sup>Cold Spring Harbor Laboratory, Cold Spring Harbor, NY 11724, USA.

<sup>4</sup>Program in Neuroscience and Medical Scientist Training Program, Stony Brook University,  
Stony Brook, NY, USA

<sup>5</sup>Program in Neuroscience, Department of Neurobiology and Behavior, Stony Brook University,  
Stony Brook, NY, USA

<sup>6</sup>Institute of Brain Science, FuDan University, Shanghai, China

\* corresponding author: [josh.huang@duke.edu](mailto:josh.huang@duke.edu)

## ABSTRACT

Variations in size and complexity of the cerebral cortex result from differences in neuron number and composition, which are rooted in evolutionary changes in direct and indirect neurogenesis (dNG and iNG) mediated by radial glial progenitors and intermediate progenitors, respectively. How dNG and iNG differentially contribute to cortical neuronal number, diversity, and connectivity are unknown. Establishing a genetic fate-mapping method to differentially visualize dNG and iNG in mice, we found that while both dNG and iNG contribute to all cortical structures, iNG contributes the largest relative proportions to the hippocampus and neocortex compared to insular and piriform cortex, claustrum, and the pallial amygdala. Within the neocortex, whereas dNG generates all major glutamatergic projection neuron (PN) classes, iNG differentially amplifies and diversifies PNs within each class; the two neurogenic pathways generate distinct PN types and assemble fine mosaics of lineage-based cortical subnetworks. Our results establish a ground-level lineage framework for understanding cortical development and evolution by linking foundational progenitor types and neurogenic pathways to PN types.

## INTRODUCTION

The cerebral cortex is the largest brain structure in mammals comprising vast and diverse nerve cells that enable high-level brain functions, but the developmental mechanisms and logic underlying its neuronal diversity remain poorly understood. Cortical development begins with neurogenesis from progenitors lining the embryonic cerebral ventricle wall, which undergoes two fundamental forms of cell division that give rise to all glutamatergic neurons (Cardenas and Borrell, 2020). In direct neurogenesis (dNG), a radial glial cell (RG) undergoes asymmetric division to self-renew as well as generate one neuronal progeny (Miyata et al., 2001; Noctor et al., 2001; Rakic, 2009; Tamamaki et al., 2001); in indirect neurogenesis (iNG), RG asymmetric division produces an intermediate progenitor (IP), which then undergoes symmetric division to generate two neurons (Haubensak et al., 2004; Kriegstein et al., 2006; Miyata et al., 2004; Noctor et al., 2004). Whereas dNG is ubiquitous along the neural tube that gives rise to the central nervous system, iNG is restricted to the telencephalon giving rise to the forebrain, especially the cerebral cortex (Haubensak et al., 2004). Across evolution, while RG-mediated dNG originated before the dawn of vertebrates and has been conserved ever since, IP-mediated iNG is thought to have emerged in the last common ancestors (LCA) of amniotes and subsequently diverged along two different evolutionary paths (Cardenas and Borrell, 2020). Along the Sauropsids clade, dNG has dominated neuronal production across different pallial structures, including the 3-layered dorsal cortex of extant non-avian reptiles and the pallia of most avian species; iNG has remained rudimentary in most Sauropsids, only to expand in certain birds (corvids) where it drives increased neuron numbers and density in nuclear structures of their pallium (Cardenas et al., 2018) (Nomura et al., 2016; Striedter and Charvet, 2009). On the other hand, along the Synapsids path, iNG has expanded tremendously, particularly in the dorsal pallium, and is thought to drive the evolutionary innovation of a six-layered neocortex (Cheung et al., 2010; Florio and Huttner, 2014; Martinez-Cerdeno et al., 2006) (Villalba et al., 2021). While the amplification of cortical neuron production through IPs is inherent to iNG (Kriegstein et al., 2006), how dNG and iNG coordinate to generate the increasing diversity of glutamatergic PN types that assemble cortical networks has remained unknown.

Across the embryonic pallial subdivisions, the medial domain gives rise to the hippocampal formation; dorsal domain to the neocortex; lateral domain to insular cortex and claustrum; and the ventral domain to the piriform cortex and the pallial amygdala (Cardenas and Borrell, 2020). Among these, the six-layered neocortex comprises hierarchically organized pyramidal neuron (PyN) classes, each containing multiple finer-grained molecular and projection defined subtypes (Harris and Shepherd, 2015; Tasic et al., 2018). Within this hierarchy, the intratelencephalic (IT) class mediates myriad processing streams within the cerebral hemisphere (including ipsi- and contra-lateral intracortical and striatal projections), and the extratelencephalic (ET) class mediates subcortical outputs, including pyramidal tract (PT) neurons that project to all subcortical targets and the corticothalamic (CT) neurons that exclusively target the thalamus (Harris and Shepherd, 2015). A major unresolved question is how dNG and iNG contribute to the generation of different genetic and projection defined PyN types – the basic elements of neocortical circuit assembly and function. Furthermore, a quantitative assessment of dNG and iNG contribution to the broadly defined pallial/cortical structures and associated cytoarchitectures have not been achieved.

Addressing these questions requires a method to distinguish dNG and iNG and track their developmental trajectories from progenitor types to PN types in the same animal.

Here, we deploy a novel genetic fate-mapping method to simultaneously visualize dNG and iNG as well as their PN progeny in mature cortex in mice. We have previously systematically generated mouse genetic tools targeting RG, IP, and PN types (Matho et al., 2021). We establish a genetic intersection-subtraction strategy and demonstrate that while dNG and iNG generate PNs for all cortical structures, iNG makes increasing contributions to cortical structures along the ventral-dorsal-medial axis, with the largest contributions to the neocortex and hippocampus. Within the neocortex, while dNG generates all major IT, PT, and CT classes, iNG differentially amplifies and diversifies PyN types within each class, with disproportionately large contribution to the IT class. Importantly, dNG and iNG derived PyN subtypes across as well as within genetically defined major subpopulations show distinct projection patterns, indicating that they assemble fine mosaics of lineage-specified and evolutionarily-rooted cortical subnetworks. Our results reveal a ground level lineage basis of cortical development and evolution by linking foundational progenitor types and neurogenic mechanisms to PN types and their connectivity.

## RESULTS

To distinguish and differentially fate map dNG and iNG in the same animal, we designed a genetic intersection and subtraction strategy in mice (Fig 1A). As all IPs are defined by expression of the T-box transcription factor *Tbr2*, we generated a *Tbr2-2A-Flp* gene knockin driver line, orthogonal to multiple Cre driver lines that target RGs and PNs (Franco et al., 2012; Matho et al., 2021). Similar to our *Tbr2-2A-CreER* driver (Matho et al., 2021), *Tbr2-2A-Flp* specifically marked IPs and their PN progeny across all cortical structures (Supp Fig 1). Within the neocortex, *Tbr2-2A-Flp* marked PyNs across layers, which included the IT, PT, and CT classes (Supp Fig 1). We then combined *Tbr2-2A-Flp* with a *Emx1-Cre* driver that targeted RGs and a *Intersection/Subtraction (IS)* reporter, which expressed RFP in Cre-NOT-Flp cells and GFP in Cre-AND-Flp cells. This strategy enabled differential labeling of dNG and iNG in the same mouse. At E14, RFP-labeled RGs resided in the VZ, characterized by their end-feet at the ventricle wall and radial fibers extending to pial surface (Fig 1B). In sharp contrast, GFP-labeled IPs were entirely absent in VZ and were restricted to the SVZ (Fig 1B). By E17, in addition to RFP-labeled RGs and GFP-labeled IPs, dNG- and iNG-derived PyNs were differentially labeled in the cortical plate (CP; Fig 1C).

To fate map dNG- and iNG-derived PNs, we quantified the percentage of RFP and GFP labeled neurons across multiple cortical regions in P30 mice. This analysis provides the first quantitative assessment of dNG and iNG contributions across cortical structures. Consistent with previous results (Kowalczyk et al., 2009), dNG- and iNG-derived PNs constituted 21.8% and 78.2%, respectively, in all neurons of the neocortex. iNG contributed more to upper layer PNs (Layers 2-4) with 11.8% dPNs and 88.2% iPNs, compared to 31.8% dPNs and 68.2% iPNs in lower layers (Layers 5-6; Fig.1D,G). iNG contributed to a significantly and progressively smaller fraction to the basolateral amygdala (BLA), claustrum, insular

and piriform cortex (Fig.1D,F,G). Surprisingly, iNG makes the largest contribution to PNs in the hippocampus, with significantly larger fractions than in neocortex (89.9%, 87.55, 82.6% in CA1, CA3, and dentate gyrus (DG), respectively) (Fig.1E,G). Therefore, while both dNG and iNG contribute to all cortical structures, iNG makes larger contribution to more recently evolved structures, with disproportionate contribution to the neocortex and hippocampus. Notably, iNG contributes to cerebral structures of diverse cytoarchitectures, from six-layered neocortex, folded sheet of hippocampus, and nuclear structure of amygdala and claustrum. The fact that the hippocampus contains the largest fraction of iNG-derived PNs suggests that increased iNG per se does not directly lead to the six-layered cytoarchitecture seen in the neocortex.

Within the neocortex, dNG and iNG both generated all major projection classes, including IT, PT, CT (Supp Fig 2). We thus assessed the contribution of iNG to the generation of different major classes of PyNs. Using the *Tbr2-2A-Flp* mice in which all iNG derived PNs expressed RFP, we quantified the percentage of RFP cells in a set of lineage transcription factor (TF)-defined PN subpopulations by immunofluorescence (Fig 2A). As expected, the vast majority of SATB2 and CUX1 IT neurons, especially those in upper layers, were derived from iNG (Fig 2B). Interestingly, half of the CTIP2 defined PT neurons derived from iNG (Fig 2C). Notably, the large majority (~70%) of CT neurons defined by TBR1 derived from dNG; and within CT neurons, nearly 80% of the FOXP2 subpopulation and the entire TLE4 subpopulation derived from dNG (Fig 2D,E). Therefore, although dNG is initiated from the beginning of neurogenesis and generates predominantly deep layer CT and PT neurons, it continues to generate some upper layer IT neurons during late neurogenesis. Similarly, although iNG is known to generate the vast majority of upper layer IT neurons during mid-to-late neurogenesis (Mihalas et al., 2016), it also makes significant contributions to the early generation of L6 CT and L5 PT neurons.

To substantiate the above result, we deployed our genetic intersection-subtraction strategy. By combining *Tbr2-Flp* and *IS* with a set of gene knock-in Cre driver lines that define PN subpopulations (Matho et al., 2021) (Fig 3A), we simultaneously visualized the distribution and morphology of dNG- and iNG-derived PNs in each subpopulation in the same animal (Fig 3B). Within the IT class, we have previously shown that *Cux1* positive PNs (PNs<sup>Cux1</sup>) mainly project within the cortex but not to the striatum, while PNs<sup>PlxnD1</sup> project to ipsi- and contra-lateral cortex and striatum (Matho et al., 2021). IS labeling by postnatal tamoxifen induction in *Cux1-CreER* and *PlxnD1-CreER* drivers revealed that all postnatal PNs<sup>Cux1</sup> and PNs<sup>PlxnD1</sup> were GFP<sup>+</sup> and thus derived from iNG (Fig 3C,D). Interestingly, early postnatal expression of *Lhx2* defines a subset of upper layer IT PNs (Matho et al., 2021), and IS labeling by P3 induction in the *Lhx2-CreER* driver revealed that 23.5% of PNs<sup>Lhx2</sup> derived from dNG and 76.5% from iNG. dPNs<sup>Lhx2</sup> and iPNs<sup>Lhx2</sup> were extensively intermixed across L2/3 (Fig 3E).

Within the PT class, FEZF2 is a master TF that specifies the postmitotic PT fate, and our *Fezf2-CreER* driver captures the large majority of PT PNs (Matho et al., 2021). IS labeling by postnatal induction in *Fezf2-CreER* revealed that PNs<sup>Fezf2</sup> were equally generated from dNG and iNG, and dPNs<sup>Fezf2</sup> and iPNs<sup>Fezf2</sup> were extensively intermixed across L5B and L6 (Fig 3F). Finally, the *Tle4-CreER* driver captures a subset of CT PNs, and IS labeling by postnatal induction in *Tle4-CreER* revealed that all PNs<sup>Tle4</sup> were generated from dNG (Fig 3G). Together, these results demonstrate that dNG and iNG

generate distinct subpopulations of PNs within each major class, which project to distinct cortical and subcortical regions (Fig 3H).

Beyond the neocortex, IS labeling also revealed dPNs<sup>Fezf2</sup> and iPNs<sup>Fezf2</sup> in the BLA, subiculum, and DG in the hippocampus. In addition, dPNs<sup>Lhx2</sup> and iPNs<sup>Lhx2</sup> were labeled in the DG in roughly equal ratios revealing the contribution of iNG to postnatal DG development, as previously shown (Hodge et al., 2013). An equal contribution from dNG suggests the importance of both these two neurogenic pathways in creating a mosaic of dentate granule cells (Supp Fig 4). These results suggest a role of both dNG and iNG in the development of PNs<sup>Fezf2</sup> and PNs<sup>Lhx2</sup> subpopulations in other cortical structures.

The extensive intermixing of dPN<sup>Fezf2</sup> with iPN<sup>Fezf2</sup> and dPN<sup>Lhx2</sup> with iPN<sup>Lhx2</sup> further raises the question of whether these lineage-distinct subpopulations represent separate subtypes even though they appear similar in laminar position and dendritic morphology. We thus examined whether these subpopulations show differences in their projection patterns. Across their subcortical targets, dPN<sup>Fezf2</sup> and iPN<sup>Fezf2</sup> axons remained extensively intermixed, with no clear evidence of targeting distinct regions (Supp Fig. 5B). To examine whether dPNs<sup>Fezf2</sup> and iPNs<sup>Fezf2</sup> differentially project to specific subcortical targets, we injected a retrograde tracer CTB into several of their targets in postnatal induced *Fezf2-CreER;Tbr2-Flp;IS* mice (Fig 4A, Supp Fig 5A,B). dPNs<sup>Fezf2</sup> and iPNs<sup>Fezf2</sup> in S1<sub>bfd</sub> projected largely equally to the spinal cord (47.9% and 52.1%, respectively) and striatum (49.1% and 50.9%, respectively) (Supp Fig.5C-G). However, of the CTB and RFP/GFP double labeled PNs, three times more dPNs<sup>Fezf2</sup> (RFP) than iPNs<sup>Fezf2</sup> (GFP) in S1<sub>bfd</sub> somatosensory (76.2% and 23.8%, respectively) and CFA motor cortex (75.4% and 24.6%, respectively) projected to the higher order thalamic nucleus (Posterior, Po nucleus) (Fig.4C-F).

PNs<sup>Lhx2</sup> projected to the corpus callosum but only sparsely to the striatum (Supp Fig 6B, C). To examine potential projection differences between dPNs<sup>Lhx2</sup> and iPNs<sup>Lhx2</sup>, we injected CTB in the contralateral S1<sub>bfd</sub> (contraS1) or ipsilateral M2 (ipsiM2) for analysis in the ipsiS1<sub>bfd</sub> of P3 induced *Lhx2-CreER;Tbr2-Flp;IS* mice (Fig 4B). contraS1 received projections from a similar proportion of dPNs<sup>Lhx2</sup> and iPNs<sup>Lhx2</sup> in homotypic ipsiS1<sub>bfd</sub> (Fig.4G-I), as well as in heterotypic ipsilateral M1, M2 and V1 (Supp Fig.6D-G). In sharp contrast, ipsiM2 received a 9.4-fold higher projection from dPNs<sup>Lhx2</sup> than from iPNs<sup>Lhx2</sup> in ipsiS1<sub>bfd</sub> (Fig 4J-L), and this dPNs<sup>Lhx2</sup> versus iPNs<sup>Lhx2</sup> projection difference is 12-fold higher in ipsiM1 and 9.23-fold higher in ipsiS1<sub>fl</sub> (Supp Fig.6H-K). In summary, dPNs<sup>Lhx2</sup> extend much stronger projections to ipsilateral cortical areas compared to iPNs<sup>Lhx2</sup>. Therefore, even within the same TF-defined subpopulations that are highly intermixed, dPNs and iPNs show preferential projection patterns (Fig. 4F,M). Together with the categorical distinction of dNG-generated PNs<sup>Tle4</sup> and iNG-generated PNs<sup>Cux1</sup> and PNs<sup>PlxnD1</sup>, these results indicate that dNG and iNG generate distinct projection subtypes within marker defined PN subpopulations.

## DISCUSSION

Our findings provide the first quantitative assessment of dNG and iNG contributions across cerebral cortical structures and to distinct PyN types in the neocortex that assemble different subnetworks.

Previous studies have emphasized the role of SVZ/iNG in the generation of upper layer PyNs of the neocortex, suggesting that the rise of iNG in mammals contribute to the formation of a six-layered cytoarchitecture (Cardenas and Borrell, 2020; Cheung et al., 2010; Martinez-Cerdeno et al., 2006; Villalba et al., 2021). Our results demonstrate that iNG in fact contributes to the generation of all pallial/cortical structures in mice, including those which are considered phylogenetically “old”, archi- and paleo- cortices. We provide the first quantitative assessment of dNG and iNG contribution across these structures, from the laminated neocortex, hippocampus and piriform cortex to nuclear structures of the amygdala and claustrum. It is interesting to note that, beyond mammals, the increase of iNG in corvids correlates with the rise of laminated (Wulst/hyperpallium) and nuclear pallial structures (DVR) (Cardenas et al., 2018; Nomura et al., 2016; Striedter and Charvet, 2009). We further reveal that along the cortical medial-lateral axis, iNG makes progressively lower contributions, with sharp decreases in the amygdala and piriform cortex. Surprisingly, iNG makes the largest relative contribution to the hippocampus, significantly more than the neocortex. These results suggest that the rise of iNG per se did not simply lead to increased lamination in cytoarchitecture (i.e. six-layered neocortex). More likely, the fundamental consequence of iNG is the increase in cell number and diversity, which can assemble multiple forms of cytoarchitectures ranging from a folded cell sheet of the hippocampus to six-layered neocortex and to nuclear structures like the amygdala and claustrum. Consistent with this notion, hippocampal neurogenesis proceeds in parallel with that of the neocortex (Bond et al., 2020; Chen et al., 2017; Xu et al., 2014), and recent single cell transcriptome analysis in mouse hippocampus has revealed a cell type diversity comparable to that of the neocortex (Yao et al., 2021).

A key component in neocortical development and evolution has been the diversification of PN types (Arendt et al., 2016; Briscoe and Ragsdale, 2018; Colquitt et al., 2021; Tosches et al., 2018). Although previous studies show that iNG generates PNs in all neocortical layers, and particularly those in the upper layers (Mihalas et al., 2016; Mihalas and Hevner, 2018; Vasistha et al., 2015), they have not resolved the relative contributions of dNG and iNG to different PN types. We show that dNG in fact generates all major cortical PyN classes, while iNG differentially amplifies and diversifies PyN types within each class. iNG not only makes disproportionately large contribution to the IT class as expected, it also contributes to half of the PT class and a significant portion of the CT class. Interestingly, dNG remains the major source of CT class, likely reflecting its dominance over iNG during the early phase of neurogenesis that gives rise to L6 CT neurons. It is conceivable that the CT class may have evolved in mammals from the diversification of ancestral “PT-type” cells which can be found in several vertebrates (Dugas-Ford et al., 2012; Ebbesson and Schroeder, 1971; Ocana et al., 2015).

Furthermore, dNG and iNG derived PyN types across (PNs<sup>Cux1</sup>, PNs<sup>PlxnD1</sup>, PNs<sup>Tle4</sup>) as well as within (PNs<sup>Fezf2</sup>, PNs<sup>Lhx2</sup>) genetically defined major subpopulations show distinct projection patterns. These results indicate that dNG and iNG assemble a fine mosaic of lineage-based and likely evolutionarily-rooted cortical subnetworks (Fig. 5). As RG-dNG and IP-iNG undergo fundamentally distinct cell division patterns, their neuronal progenies derive from different birth pattern and order (asymmetric division from RGs vs symmetric cell division from IPs), which likely confer differential chromatin landscapes that impact transcription profiles (Pinson and Huttner, 2021). Multi-omics analysis of dNG and iNG-derived PNs may reveal their epigenomic and transcriptomic distinctions that underlie their

phenotypic distinctions. At the level of circuit connectivity, the categorical distinction between iNG-derived PNs<sup>Cux1</sup> and PNs<sup>PlxnD1</sup> versus dNG-derived PNs<sup>Tle4</sup> indicate separate construction of major cortical networks and associated brain systems. Our finding of seemingly more subtle projection differences between dNG- and iNG-derived PN<sup>Fezf2</sup> and PN<sup>Lhx2</sup> by retrograde labeling are likely underestimates; methods that quantify synaptic connectivity may reveal further distinction between dPNs and iPNs within genetically defined subpopulations. A major further challenge is to discover whether and how the distinction of dNG and iNG-derived PNs manifest at the level of circuit function underlying behavior; such studies require methods to differentially monitor and manipulate the activity of dNG and iNG-derived PNs.

As brain structures assemble and organize at multiple levels from molecules to cells, embryological territories, and neural circuits, these levels can evolve independently of one another, and homology at one level does not require conservation at other levels. Given that cell types are the elemental units of gene regulation as well as neural circuit assembly, they also constitute the basic units of conservation and divergence linking genomic changes to the evolutionary innovations of tissue organization and behavior. Indeed, recent studies suggest that extant amniotes possess a variety of divergent pallial structures, from six-layered neocortex in mammals to three-layered dorsal cortex in non-avian reptiles to nucleus-like pallia in birds. They share a conserved set of neuronal cell types and circuitries, the basic elements of which can be traced back even to the earliest of vertebrates (Briscoe and Ragsdale, 2018; Cardenas and Borrell, 2020; Lamanna et al., 2022; Suryanarayana et al., 2021) (Fig 5). A key approach in this cell type perspective of cortical evolution is to delineate the developmental trajectories from progenitor types to neuronal cell types in the assembly of brain circuits. Our finding of distinct developmental trajectories of dNG and iNG begin to provide a ground-level lineage framework of cortical development and evolution by linking foundational progenitor types and neurogenic pathways with conserved and diversified PN types across species, dating from the pan-vertebrate dNG to the emergence of iNG in the amniote LCA (Briscoe and Ragsdale, 2018; Cardenas and Borrell, 2020; Suryanarayana et al., 2021). Such a cell lineage framework may facilitate exploring the evolutionary origin of the neocortex and its relationship to possible homologous pallial structures across vertebrates (Suryanarayana et al., 2021). Cellular resolution multi-modal analysis based on this lineage framework may guide evolutionary comparisons, linking developmental genetic programs in progenitor types to transcriptome profiles in cell types (Colquitt et al., 2021; Tosches et al., 2018) and to neural circuit organization across cortical structures, including the neocortex.



## **AUTHOR CONTRIBUTIONS**

Z.J.H. and D.H. conceived the project.

Z.J.H., D.H. and J.M.L. designed the experiments,

M.H. and P.W. designed and generated the *Tbr2-2A-FlpO* knock-in mouse line.

D.H. and J.M.L. performed fate mapping, immunohistochemistry, imaging and quantification.

D.H., B.-S.W. and W.G. conducted the injection experiments.

Z.J.H., D.H. and S.M.S wrote the manuscript.

## **ACKNOWLEDGEMENTS**

We thank Debra L. Silver, Richard Mooney and György Buzsáki for comments on the manuscript. We thank L. Li at CSHL for help with generation of *Tbr2-2A-Flp* knock-in; Jonathan Werner for help with quantification related to Figs 2,4; the CSHL and Duke University animal resources for mouse husbandry; and the CSHL Microscopy shared resource and Duke University Light Microscopy Core Facility. This research was supported by NIH grant U19MH114823-01 to Z.J.H. D.H. was supported by the Human Frontier Science Program long-term fellowship LT000075/2014-L and NARSAD Young Investigator grant no. 26327. J.M.L. was supported by the NRSA F30 Medical Scientist Predoctoral Fellowship 5F30MH108333. B.-S.W. was supported by NRSA Postdoctoral Fellowship NIH5F32NS096877-03. Z.J.H is supported by a NIH Director's Pioneer Award 1DP1MH129954-01.

## MAIN FIGURE LEGENDS

### Fig.1: dNG and iNG differentially contribute to PNs across cortical structures

(A) Top schematic shows that whereas RGs (red) exist throughout the neural tube, IPs (green) are present only in the telencephalon. Bottom coronal view from the boxed region of telencephalon shows the four subdivisions of the pallial neuroepithelium along the medio-lateral axis; medial (M), dorsal (D), lateral (L) and ventral (V) pallia, each generating distinct cortical structures. Within the neuroepithelium, RGs mediate direct neurogenesis (red) and through IPs (green), indirect neurogenesis to produce PNs (triangles). dNG and iNG can be simultaneously visualized by a genetic fate-mapping scheme using the IS reporter with *Emx1-Cre* (RG) and *Tbr2-Flp* (IP) drivers: dNG (*Emx1<sup>+</sup>/Tbr2<sup>-</sup>*) is labeled by RFP through ‘Cre-NOT-Flp’ subtraction; iNG (*Emx1<sup>+</sup>/Tbr2<sup>+</sup>*) is labeled by EGFP through ‘Cre-AND-Flp’ intersection. (B) Coronal hemi-sections of the pallial neuroepithelium, showing the labeling of RGs (top) and IPs (middle) and merged image (bottom) at E14. Right panels are magnified views of boxed regions in left panels. Arrows indicate RGs soma and radial fibers in the VZ; IPs reside in the SVZ and are absent in the VZ (asterisk). (C) Coronal hemi-sections at similar levels as in (B), but at E17. Note the appearance of dNG (RFP) and iNG (GFP) derived PNs in the cortical plate (CP). (D) Coronal section of the cortex shows both dPNs (RFP) and iPNs (GFP) across laminae (upper and lower layers magnified in right panels), in the BLA (D’) and piriform cortex (D’’). (E) Coronal view of the hippocampus shows a large contribution from iPNs in different subfields; CA1, CA3 and DG. (F) Anterior coronal section shows dPNs and iPNs in the insular cortex (F’) and claustrum (F’’). (G) Quantification of differential contributions of dNG and iNG across distinct pallial structures; Y-axes are numbers of PNs quantified. Percentage of dPNs and iPNs indicated in the bar graph for respective structures shown in (D-F). (H) Quantification of differential contributions of dNG and iNG across distinct pallial structures reveal a gradient of iNG contribution from medial-to-ventral structures; percentage of iPNs are indicated in the bar graph. Note the high contribution of iPNs to the hippocampus and neocortex and their decrease in cortical structures along the medio-ventral axis. 300-1000 cells were counted in 4-6 mice for each structure. In (B & C), the dashed line indicates the ventricle boundary. Scale bars 100 $\mu$ m (B,C); 20 $\mu$ m (insets B,C); 1mm (E,F); 100 $\mu$ m (all other scale bars). Abbreviations: tel, telencephalon; RG, radial glial cell; IP, intermediate progenitor; VZ, ventricular zone; SVZ, subventricular zone; S1<sub>bfd</sub>, primary somatosensory barrel field cortex; BLA, basolateral amygdala; Hippo, hippocampus; DG, dentate gyrus; Ncx, neocortex.

### Fig.2: iNG differentially contributes to marker-defined cortical PN classes

(A) Schematic showing a genetic strategy to label all IPs and their derived iPNs using *Tbr2-Flp* and a *Flp*-dependent reporter (also see Supp Fig.1A). Transcriptional network interactions implicated in the postmitotic specification of IT, PT and CT PNs are also shown. (B) Representative images of immunohistochemistry using antibodies against the TFs in *Tbr2-Flp* brains: anti-SATB2 (left) and anti-CUX1 (right) label IT PNs; (C) anti-CTIP2 labels PT PNs; and (D) anti-TBR1 (left), anti-FOXP2 (middle), and anti-TLE4 (right) label CT PNs. Arrowheads indicate double-positive cells; Dashed circles show non-colocalized RFP<sup>+</sup> cells. (E) Quantification of immunohistochemical markers that label TF-defined iPN types in P30 *Tbr2-Flp* mice. Percentages of iPNs positive for a given TF marker are indicated above each bar graph. Quantifications were performed in S1<sub>bfd</sub> from 6 sections (2000 cells) from 4-6 mice each. Scale bars 100 $\mu$ m. Abbreviations: IT, intratelencephalic; PT, pyramidal tract; CT, corticothalamic; UL, upper layer; LL, lower layer; S1<sub>bfd</sub>, primary somatosensory barrel field cortex.

### Fig.3: dNG and iNG differentially contribute to neocortical PN projection types

- (A) GLU PyNs are subdivided into broad IT and ET classes, and ET consists of PT and CT subclasses. Each of these major classes comprises multiple subpopulations defined by marker gene expression. Genes used for generating CreER driver lines are in blue.
- (B) Different *PN-CreER* driver lines, when combined with IS reporter line *Tbr2-Flp*, can simultaneously resolve dNG (Cre-NOT-Flp) and iNG (Cre-AND-Flp) derived subpopulations within a marker gene defined PN type.
- (C) PNs<sup>*Cux1*</sup> (L2-4 ITs, cortico-cortical PNs) and (D) PNs<sup>*PlexinD1*</sup> (subset of L2-5a ITs, cortico-cortical, corticostriatal PNs) were entirely iNG-derived, when corresponding driver lines were induced at P21.
- (E) PNs<sup>*Lhx2*</sup> (L2-4 ITs) were predominantly generated from iNG (76.5%) when the corresponding driver line was induced at P3.
- (F) PNs<sup>*Fezf2*</sup> (PTs) were generated equally from dNG and iNG when the driver line was induced at P21.
- (G) PNs<sup>*Tle4*</sup>, a CT subpopulation, were born entirely from dNG.
- (H) dNG (red) and iNG (green) generate distinct genetic and projection defined PN subpopulations across IT, PT, and CT classes. Quantifications (C-G, bottom row) were performed in S1<sub>bfd</sub> from 5 mice for 750-1500 cells each. Data are mean ± SEM. Scale bars, 1mm (low mag); 100µm (high mag). Abbreviations: GLU, glutamatergic pyramidal neurons; IT, intratencephalic, ET, extratencephalic, PT, pyramidal tract; CT, corticothalamic; S1<sub>bfd</sub>, primary somatosensory barrel field cortex; Ipsi, ipsilateral; Contra, contralateral; ctx, cortex; Pr Thal, primary thalamus; HO Thal, higher order thalamus; BS, brainstem; Spd, spinal cord; TM, tamoxifen induction

### Fig. 4. dPNs<sup>*Fezf2*</sup> and dPNs<sup>*Lhx2*</sup> in the neocortex project preferentially to higher-order thalamus and ipsilateral cortical areas, respectively

- (A-B) Schematics depicting retrograde CTB labeling from the Po (higher order) nucleus of thalamus in *Fezf2-CreER;Tbr2-Flp;IS* (PNs<sup>*Fezf2*</sup>) mice induced at P21(A) or from either S1<sub>bfd</sub> or M2 in *Lhx2-CreER;Tbr2-Flp;IS* (PNs<sup>*Lhx2*</sup>) mice induced at P3 (B).
- (C) Coronal hemisection of the neocortex from a PNs<sup>*Fezf2*</sup> brain showing the injection site, Po (asterisk, left) and analysis in S1<sub>bfd</sub> (right).
- (D) CTB labeling (middle panel) colocalized with dPNs<sup>*Fezf2*</sup> (open arrowheads, left panel) or iPNs<sup>*Fezf2*</sup> (white arrowheads, right panel).
- (E) Quantification in S1<sub>bfd</sub> (left) showed 76.2% of CTB and RFP/GFP double labeled cells were dPNs<sup>*Fezf2*</sup> and 23.8% were iPNs<sup>*Fezf2*</sup>. In the CFA (motor area), 75.4% of CTB and RFP/GFP double labeled cells were dPNs<sup>*Fezf2*</sup> and 24.6% were iPNs<sup>*Fezf2*</sup>.
- (F) Schematic showing that dPNs<sup>*Fezf2*</sup> preferentially project to the higher-order thalamus when compared with iPNs<sup>*Fezf2*</sup>.
- (G) CTB injected in S1<sub>bfd</sub> (asterisk) of PNs<sup>*Lhx2*</sup> mice and analyzed for colocalization in the contraS1<sub>bfd</sub>.
- (H) CTB (middle panel) colocalizes with more iPNs<sup>*Lhx2*</sup> (right panel arrowheads, GFP) and relatively fewer dPNs<sup>*Lhx2*</sup> (left panel open arrowheads, RFP) in contraS1<sub>bfd</sub>.
- (I) Quantification shows that 80.5% of CTB-XFP double labeled cells were iPNs<sup>*Lhx2*</sup> and 19.5% were dPNs<sup>*Lhx2*</sup> (left). When normalized to the ratio of dPNs<sup>*Lhx2*</sup> and iPNs<sup>*Lhx2*</sup>, iPNs<sup>*Lhx2*</sup> showed 1.35 fold more than dPNs<sup>*Lhx2*</sup> in projection to contraS1<sub>bfd</sub>.
- (J) CTB injected in M2 (asterisk, left) and analyzed in PNs<sup>*Lhx2*</sup> mice in the ipsilateral, ipsiS1<sub>bfd</sub> (right)
- (K) CTB colocalizes with more dPNs<sup>*Lhx2*</sup> (left panel white arrowheads, RFP) compared to iPNs<sup>*Lhx2*</sup> (right panel open arrowheads, GFP).

(L) Among CTB and RFP/GFP double labeled cells in ipsiS1<sub>bfd</sub>, 72.6% were dPNs<sup>Lhx2</sup> and 27.4% were iPNs<sup>Lhx2</sup> (left). When normalized to the ratio of dPNs<sup>Lhx2</sup> and iPNs<sup>Lhx2</sup> in ipsiS1<sub>bfd</sub>, dPNs<sup>Lhx2</sup> showed a 9.4-fold higher projection to iM2 than iPNs<sup>Lhx2</sup>.

(M) Summary schematic showing dPNs<sup>Lhx2</sup> preferentially projecting to ipsilateral cortical areas when compared with iPNs<sup>Lhx2</sup>. Quantifications were performed in S1<sub>bfd</sub> or CFA from 1000 cells, 3-4 mice for PN<sup>Fezf2</sup> in (E). For PN<sup>Lhx2</sup>, 300-450 cells were counted from S1<sub>bfd</sub> in 3-4 animals in (I,L). Data are mean ± SEM. Scale bars, low mag (C,G,J) 1mm; high mag (D,H,K) 100µm. Abbreviations: Po, posterior nucleus of thalamus; Thal, thalamus; S1<sub>bfd</sub>, primary somatosensory barrel field cortex; M2, secondary motor cortex; inj, injection; CFA, caudal forelimb area; Spd, spinal cord; TM, tamoxifen induction.

### **Fig. 5. Schematics summarizing dNG and iNG contribution to cortical structures, a mosaic of neocortical PN types and subnetworks, and evolutionary implications**

(A) Along the medial to ventral axis of the mouse embryonic pallium, dNG and iNG generate dPNs (red) and iPNs (green) that populate all cortical structures, with decreasing iNG contributions to lateral and ventral structures.

(B) Within the neocortex, dNG generates CT (dark shade), PT (medium shade), and IT (light shade) class dPNs (red) across layers, whereas iNG differentially amplifies and diversifies genetically defined iPN types (green) within each class. iPNs have a disproportionately large contribution to the IT class.

(C) dNG (red) and iNG (green)-derived PN types are highly intermixed within the neocortex and yet show distinct projection patterns both across and within genetically defined subpopulations. Thus, dNG and iNG construct lineage-based fine mosaics of cortical subnetworks.

(D) A conceptual schema depicting the evolutionary trajectory of dNG (red) and iNG (green) with their derived major PN types in dorsal pallial homologs across vertebrates (modified from Suryanarayana et al., 2021; Briscoe and Ragsdale, 2018). dNG and their derived IT (circle) and PT (square) classes are present in lamprey (cyclostomes) and thus predate the dawn of vertebrates. IPs and iNG may have originated in the last common ancestor of amniotes. Among the Sauropsids, dNG has dominated PN production across different pallial structures, including the three-layered dorsal cortex of extant non-avian reptiles and the pallia of most avian species; iNG has remained rudimentary, only to expand in certain birds (corvids) where it drives increased neuron numbers and density in nuclear structures of their pallium. Among Synapsids including mammals, the expansion of iNG greatly amplifies and diversifies PN types across neocortical layers and PN classes. Abbreviations: M, medial pallium; D, dorsal pallium; L, lateral pallium; V, ventral pallium; Ncx, neocortex; Hippo, hippocampus; Cl, claustrum; Ins, insular cortex; BLA, basolateral amygdala; Pir, piriform cortex; ipsi, ipsilateral; contra, contralateral, BS, brain stem; Spd, spinal cord; LCA, last common amniote, IT, intratelencephalic; PT; pyramidal tract; CT, corticothalamic.

## METHODS

### Generation of *Tbr2-2A-Flp* knock-in mouse line

*Tbr2-2A-Flp* was generated by inserting a 2A-Flp cassette in-frame before the STOP codon of the targeted gene. Targeting vectors were generated using a PCR-based cloning approach as described before (Matho et al., 2021; He et al., 2016). Mouse related experimental procedures were approved by the Institutional Animal Care and Use Committee (IACUC) of the Cold Spring Harbor Laboratory (CSHL) in accordance with NIH guidelines.

### Tamoxifen induction

Tamoxifen (T5648, Sigma) was prepared by dissolving the powder in corn oil (20 mg/ml) and either applying a sonication pulse for 60s or constant magnetic stirring overnight at 37 °C. A 100–200 mg/kg dose was administered by intraperitoneal injection at the appropriate age; If two doses, 100mg/kg dose. For experiments with *Lhx2-CreER*, 200mg/kg was administered intraperitoneally at P3 from a diluted stock of 5mg/ml.

### Immunohistochemistry

Adult mice were anaesthetized (using Avertin) and transcardially perfused with saline followed by 4% paraformaldehyde (PFA) in 0.1 M phosphate buffer. After post-fixation, brains were rinsed three times in PBS and sectioned at a 65-70µm thickness with a Leica VT1000S vibratome. Embryo heads were collected in PBS and fixed in 4% PFA for 4h at room temperature, rinsed three times with PBS, equilibrated in 30% sucrose-PBS, frozen in OCT compound and cut on a cryostat (Leica, CM3050S) at 25µm coronal sections. Sections were treated with a blocking solution (10% normal goat serum and 0.2% Triton-X100 in 1X PBS) for 1h, then incubated overnight at 4°C with primary antibodies diluted in the blocking solution. Sections were washed three times in PBS and incubated for 2h at room temperature with corresponding secondary antibodies, Goat or Donkey Alexa Fluor 488, 594 or 647 (1:500, Life Technologies) and DAPI to label nuclei (1:1000 in PBS, Life Technologies, 33342). Sections were washed three times with PBS and dry-mounted on slides using Fluoromount-G (SouthernBiotech, 0100-01) mounting medium.

### Primary Antibodies

Anti-GFP (1:1000, Aves, GFP-1020), anti-RFP (1:1000, Rockland Pharmaceuticals, 600-401-379), anti-SATB2 (1:20, Abcam ab51502), anti-CUX1 (1:100, SantaCruz 13024), anti-CTIP2 (1:100, Abcam 18465), anti-TBR1 (1:250, MilliporeSigma AB2261), anti-FOXP2 (1:500, Santa Cruz sc-517261), and anti-TLE4 (1:300, Santa Cruz sc-365406) were used.

For anti-CTIP2 and anti-SATB2, brains were postfixed in 4% PFA for 4hrs at room temperature. For all other antibodies, postfixation was done overnight at 4°C

### Imaging and Quantification

Imaging from serially mounted sections was performed on a Zeiss LSM 780 or 710 confocal microscope (CSHL St. Giles Advanced Microscopy Center and Duke University Light Microscopy Core Facility) using objectives 10x and 63x for embryos, and 5x, 10x and 20x for adult mouse brains.

All imaging was done using Zeiss LSM 710 or 780 fluorescence confocal microscopes using objectives, 5x for tilescan, 10x or 20x for z-stacks. For embryos, high magnification images were obtained using 63x oil objective. To determine colocalization in adult mouse brains, confocal z-stacks were obtained centered in S1<sub>bfd</sub>, using a 20x objective. We manually determined colocalization for the desired markers by looking in individual z-planes using ImageJ/FIJI software. All quantifications were performed by two individuals. Statistics and plotting of graphs were done using GraphPad Prism 7 and Microsoft Excel 2010.

For all neocortex quantifications, we counted in 1mm x 1mm area from at least 6 sections, from 5-6 adult brains. Number of cells counted for *Emx1-Tbr2-IS* experiment: Neocortex, 1000 cells; CA1, 500 cells; CA3, 500 cells; DG, 500 cells; BLA, 300 cells; Claustrum, 300 cells; Insular cortex, 500 cells; Piriform cortex, 500 cells. For each structure we quantified at least 6 sections from 4-6 brains. To perform molecular characterization of *Tbr2-2A-Flp* brains, we stained vibratome sections for SATB2, CUX1, CTIP2, TBR1, FOXP2 and TLE4. Percentage positive cells were calculated from an average number of 2000 RFP+ cells per staining. Total number of cells counted for *PN-CreER; Tbr2-flp; IS* experiments for each line was between 750-1500. For *Fezf2-CreER; Tbr2-flp; IS* and *Lhx2-CreER; Tbr2-flp; IS* experiments, number of cells counted are: BLA, 300; Subiculum, 500; DG<sup>Fezf2</sup>, 150; DG<sup>Lhx2</sup>, 1000. For each driver line we quantified at least 6 sections from 4-6 brains. PN numbers are different due to differences in labelling density.

For CTB quantifications in Fig4(G-L) and Supp Fig 6(D-K), “normalization” refers to the ratio of number of CTB/XFP double positive cells to the total number of XFP positive cells observed (XFP is either RFP or GFP). This aided in determine the fold-difference between the projections from dPNs<sup>Lhx2</sup> and iPNs<sup>Lhx2</sup> relative to their total number. CTB quantifications for PN<sup>Fezf2</sup> were done from ~1000 cells from 3-5 mice (Fig 4, Supp Fig 5). For PN<sup>Lhx2</sup>, quantifications were done in ipsiS1<sub>bfd</sub> from ~300 cells for contraS1<sub>bfd</sub> and ~450 cells from ipsiM2 injections, from 3-4 brains each (Fig 4). In Supp Fig 6, from contraS1<sub>bfd</sub> injections, colocalization was observed in ipsiM1 (~400 cells), ipsiM2 (~90 cells), ipsiV1 (~120 cells). From ipsiM2 injections, colocalization was seen in contraM1 (~200 cells), ipsiM1 (~300 cells) and ipsiS1<sub>fl</sub> (~500 cells).

For embryonic experiments (Fig.1, Supp Fig.1), high-magnification insets are not maximum intensity projections. To observe the morphology of IPs, only a few sections from the z-plane in low-magnification images have been projected in the high-magnification images.

### Stereotaxic Injections

Adult mice were anaesthetized by 2% isoflurane inhalation with 0.4l/min airflow. Preemptive analgesics, 5mg/kg ketoprofen and 0.5mg/kg dexamethasone, were administered subcutaneously before the surgery. Lidocaine (2–4 mg/kg) was applied intra-incisionally. Mice were mounted on a stereotaxic headframe (Kopf Instruments, 940 series), and coordinates were identified. An incision was made over the scalp, a small burr hole drilled in the skull and injections were performed in either the primary somatosensory barrel field cortex (S1<sub>bfd</sub>): 1.7 posterior relative to bregma, 3.75 lateral, 0.5-0.3 in depth or in the secondary motor cortex (M2): 1.05 anterior relative to bregma, 1.0 lateral, 0.5 in depth. A pulled glass pipette tip of 20–30 μm containing CTB<sup>647</sup> (ThermoFischer Scientific, C34778) or AAV (Addgene, AAV-PHP.eB) was lowered into the brain. A 500nl (CTB) or 300-400nl (AAV) volume was

delivered at a 30nl/min using a Picospritzer (General Valve Corp); to prevent backflow, the pipette was maintained in place for 10 min prior to retraction. The incision was sutured with Tissueglue (3M Vetbond), following which mice were kept warm at 37°C until complete recovery.

## REFERENCES

- Arendt, D., Musser, J.M., Baker, C.V.H., Bergman, A., Cepko, C., Erwin, D.H., Pavlicev, M., Schlosser, G., Widder, S., Laubichler, M.D., *et al.* (2016). The origin and evolution of cell types. *Nat Rev Genet* *17*, 744-757.
- Bond, A.M., Berg, D.A., Lee, S., Garcia-Epelboim, A.S., Adusumilli, V.S., Ming, G.L., and Song, H. (2020). Differential Timing and Coordination of Neurogenesis and Astrogenesis in Developing Mouse Hippocampal Subregions. *Brain Sci* *10*.
- Briscoe, S.D., and Ragsdale, C.W. (2018). Homology, neocortex, and the evolution of developmental mechanisms. *Science* *362*, 190-193.
- Cardenas, A., and Borrell, V. (2020). Molecular and cellular evolution of corticogenesis in amniotes. *Cell Mol Life Sci* *77*, 1435-1460.
- Cardenas, A., Villalba, A., de Juan Romero, C., Pico, E., Kyrousi, C., Tzika, A.C., Tessier-Lavigne, M., Ma, L., Drukker, M., Cappello, S., *et al.* (2018). Evolution of Cortical Neurogenesis in Amniotes Controlled by Robo Signaling Levels. *Cell* *174*, 590-606 e521.
- Chen, V.S., Morrison, J.P., Southwell, M.F., Foley, J.F., Bolon, B., and Elmore, S.A. (2017). Histology Atlas of the Developing Prenatal and Postnatal Mouse Central Nervous System, with Emphasis on Prenatal Days E7.5 to E18.5. *Toxicol Pathol* *45*, 705-744.
- Cheung, A.F., Kondo, S., Abdel-Mannan, O., Chodroff, R.A., Sirey, T.M., Bluy, L.E., Webber, N., DeProto, J., Karlen, S.J., Krubitzer, L., *et al.* (2010). The subventricular zone is the developmental milestone of a 6-layered neocortex: comparisons in metatherian and eutherian mammals. *Cereb Cortex* *20*, 1071-1081.
- Colquitt, B.M., Merullo, D.P., Konopka, G., Roberts, T.F., and Brainard, M.S. (2021). Cellular transcriptomics reveals evolutionary identities of songbird vocal circuits. *Science* *371*.
- Dugas-Ford, J., Rowell, J.J., and Ragsdale, C.W. (2012). Cell-type homologies and the origins of the neocortex. *Proc Natl Acad Sci U S A* *109*, 16974-16979.
- Ebbesson, S.O., and Schroeder, D.M. (1971). Connections of the nurse shark's telencephalon. *Science* *173*, 254-256.
- Florio, M., and Huttner, W.B. (2014). Neural progenitors, neurogenesis and the evolution of the neocortex. *Development* *141*, 2182-2194.
- Franco, S.J., Gil-Sanz, C., Martinez-Garay, I., Espinosa, A., Harkins-Perry, S.R., Ramos, C., and Muller, U. (2012). Fate-restricted neural progenitors in the mammalian cerebral cortex. *Science* *337*, 746-749.
- Harris, K.D., and Shepherd, G.M. (2015). The neocortical circuit: themes and variations. *Nat Neurosci* *18*, 170-181.



- Haubensak, W., Attardo, A., Denk, W., and Huttner, W.B. (2004). Neurons arise in the basal neuroepithelium of the early mammalian telencephalon: a major site of neurogenesis. *Proc Natl Acad Sci U S A* *101*, 3196-3201.
- Hodge, R.D., Garcia, A.J., 3rd, Elsen, G.E., Nelson, B.R., Mussar, K.E., Reiner, S.L., Ramirez, J.M., and Hevner, R.F. (2013). *Tbr2* expression in Cajal-Retzius cells and intermediate neuronal progenitors is required for morphogenesis of the dentate gyrus. *J Neurosci* *33*, 4165-4180.
- Kowalczyk, T., Pontious, A., Englund, C., Daza, R.A., Bedogni, F., Hodge, R., Attardo, A., Bell, C., Huttner, W.B., and Hevner, R.F. (2009). Intermediate neuronal progenitors (basal progenitors) produce pyramidal-projection neurons for all layers of cerebral cortex. *Cereb Cortex* *19*, 2439-2450.
- Kriegstein, A., Noctor, S., and Martinez-Cerdeno, V. (2006). Patterns of neural stem and progenitor cell division may underlie evolutionary cortical expansion. *Nat Rev Neurosci* *7*, 883-890.
- Lamanna, F., Hervas-Sotomayor, F., Oel, A.P., Jandzik, D., Sobrido-Cameán, D., Martik, M.L., Green, S.A., Brüning, T., Mößinger, K., and Schmidt, J. (2022). Reconstructing the ancestral vertebrate brain using a lamprey neural cell type atlas. *bioRxiv*.
- Martinez-Cerdeno, V., Noctor, S.C., and Kriegstein, A.R. (2006). The role of intermediate progenitor cells in the evolutionary expansion of the cerebral cortex. *Cereb Cortex* *16 Suppl 1*, i152-161.
- Matho, K.S., Huilgol, D., Galbavy, W., He, M., Kim, G., An, X., Lu, J., Wu, P., Di Bella, D.J., Shetty, A.S., *et al.* (2021). Genetic dissection of the glutamatergic neuron system in cerebral cortex. *Nature* *598*, 182-187.
- Mihalas, A.B., Elsen, G.E., Bedogni, F., Daza, R.A.M., Ramos-Laguna, K.A., Arnold, S.J., and Hevner, R.F. (2016). Intermediate Progenitor Cohorts Differentially Generate Cortical Layers and Require *Tbr2* for Timely Acquisition of Neuronal Subtype Identity. *Cell Rep* *16*, 92-105.
- Mihalas, A.B., and Hevner, R.F. (2018). Clonal analysis reveals laminar fate multipotency and daughter cell apoptosis of mouse cortical intermediate progenitors. *Development* *145*.
- Miyata, T., Kawaguchi, A., Okano, H., and Ogawa, M. (2001). Asymmetric inheritance of radial glial fibers by cortical neurons. *Neuron* *31*, 727-741.
- Miyata, T., Kawaguchi, A., Saito, K., Kawano, M., Muto, T., and Ogawa, M. (2004). Asymmetric production of surface-dividing and non-surface-dividing cortical progenitor cells. *Development* *131*, 3133-3145.
- Noctor, S.C., Flint, A.C., Weissman, T.A., Dammerman, R.S., and Kriegstein, A.R. (2001). Neurons derived from radial glial cells establish radial units in neocortex. *Nature* *409*, 714-720.
- Noctor, S.C., Martinez-Cerdeno, V., Ivic, L., and Kriegstein, A.R. (2004). Cortical neurons arise in symmetric and asymmetric division zones and migrate through specific phases. *Nat Neurosci* *7*, 136-144.
- Nomura, T., Ohtaka-Maruyama, C., Yamashita, W., Wakamatsu, Y., Murakami, Y., Calegari, F., Suzuki, K., Gotoh, H., and Ono, K. (2016). The evolution of basal progenitors in the developing non-mammalian brain. *Development* *143*, 66-74.

Ocana, F.M., Suryanarayana, S.M., Saitoh, K., Kardamakis, A.A., Capantini, L., Robertson, B., and Grillner, S. (2015). The lamprey pallium provides a blueprint of the mammalian motor projections from cortex. *Curr Biol* 25, 413-423.

Pinson, A., and Huttner, W.B. (2021). Neocortex expansion in development and evolution-from genes to progenitor cell biology. *Curr Opin Cell Biol* 73, 9-18.

Rakic, P. (2009). Evolution of the neocortex: a perspective from developmental biology. *Nat Rev Neurosci* 10, 724-735.

Striedter, G.F., and Charvet, C.J. (2009). Telencephalon enlargement by the convergent evolution of expanded subventricular zones. *Biol Lett* 5, 134-137.

Suryanarayana, S.M., Perez-Fernandez, J., Robertson, B., and Grillner, S. (2021). The Lamprey Forebrain - Evolutionary Implications. *Brain Behav Evol*, 1-16.

Tamamaki, N., Nakamura, K., Okamoto, K., and Kaneko, T. (2001). Radial glia is a progenitor of neocortical neurons in the developing cerebral cortex. *Neurosci Res* 41, 51-60.

Tasic, B., Yao, Z., Graybuck, L.T., Smith, K.A., Nguyen, T.N., Bertagnolli, D., Goldy, J., Garren, E., Economo, M.N., Viswanathan, S., *et al.* (2018). Shared and distinct transcriptomic cell types across neocortical areas. *Nature* 563, 72-78.

Tosches, M.A., Yamawaki, T.M., Naumann, R.K., Jacobi, A.A., Tushev, G., and Laurent, G. (2018). Evolution of pallium, hippocampus, and cortical cell types revealed by single-cell transcriptomics in reptiles. *Science* 360, 881-888.

Vasistha, N.A., Garcia-Moreno, F., Arora, S., Cheung, A.F., Arnold, S.J., Robertson, E.J., and Molnar, Z. (2015). Cortical and Clonal Contribution of Tbr2 Expressing Progenitors in the Developing Mouse Brain. *Cereb Cortex* 25, 3290-3302.

Villalba, A., Gotz, M., and Borrell, V. (2021). The regulation of cortical neurogenesis. *Curr Top Dev Biol* 142, 1-66.

Xu, H.T., Han, Z., Gao, P., He, S., Li, Z., Shi, W., Kodish, O., Shao, W., Brown, K.N., Huang, K., *et al.* (2014). Distinct lineage-dependent structural and functional organization of the hippocampus. *Cell* 157, 1552-1564.

Yao, Z., van Velthoven, C.T.J., Nguyen, T.N., Goldy, J., Seden-Cortes, A.E., Baftizadeh, F., Bertagnolli, D., Casper, T., Chiang, M., Crichton, K., *et al.* (2021). A taxonomy of transcriptomic cell types across the isocortex and hippocampal formation. *Cell* 184, 3222-3241 e3226.

## Figure 1\_Huilgol

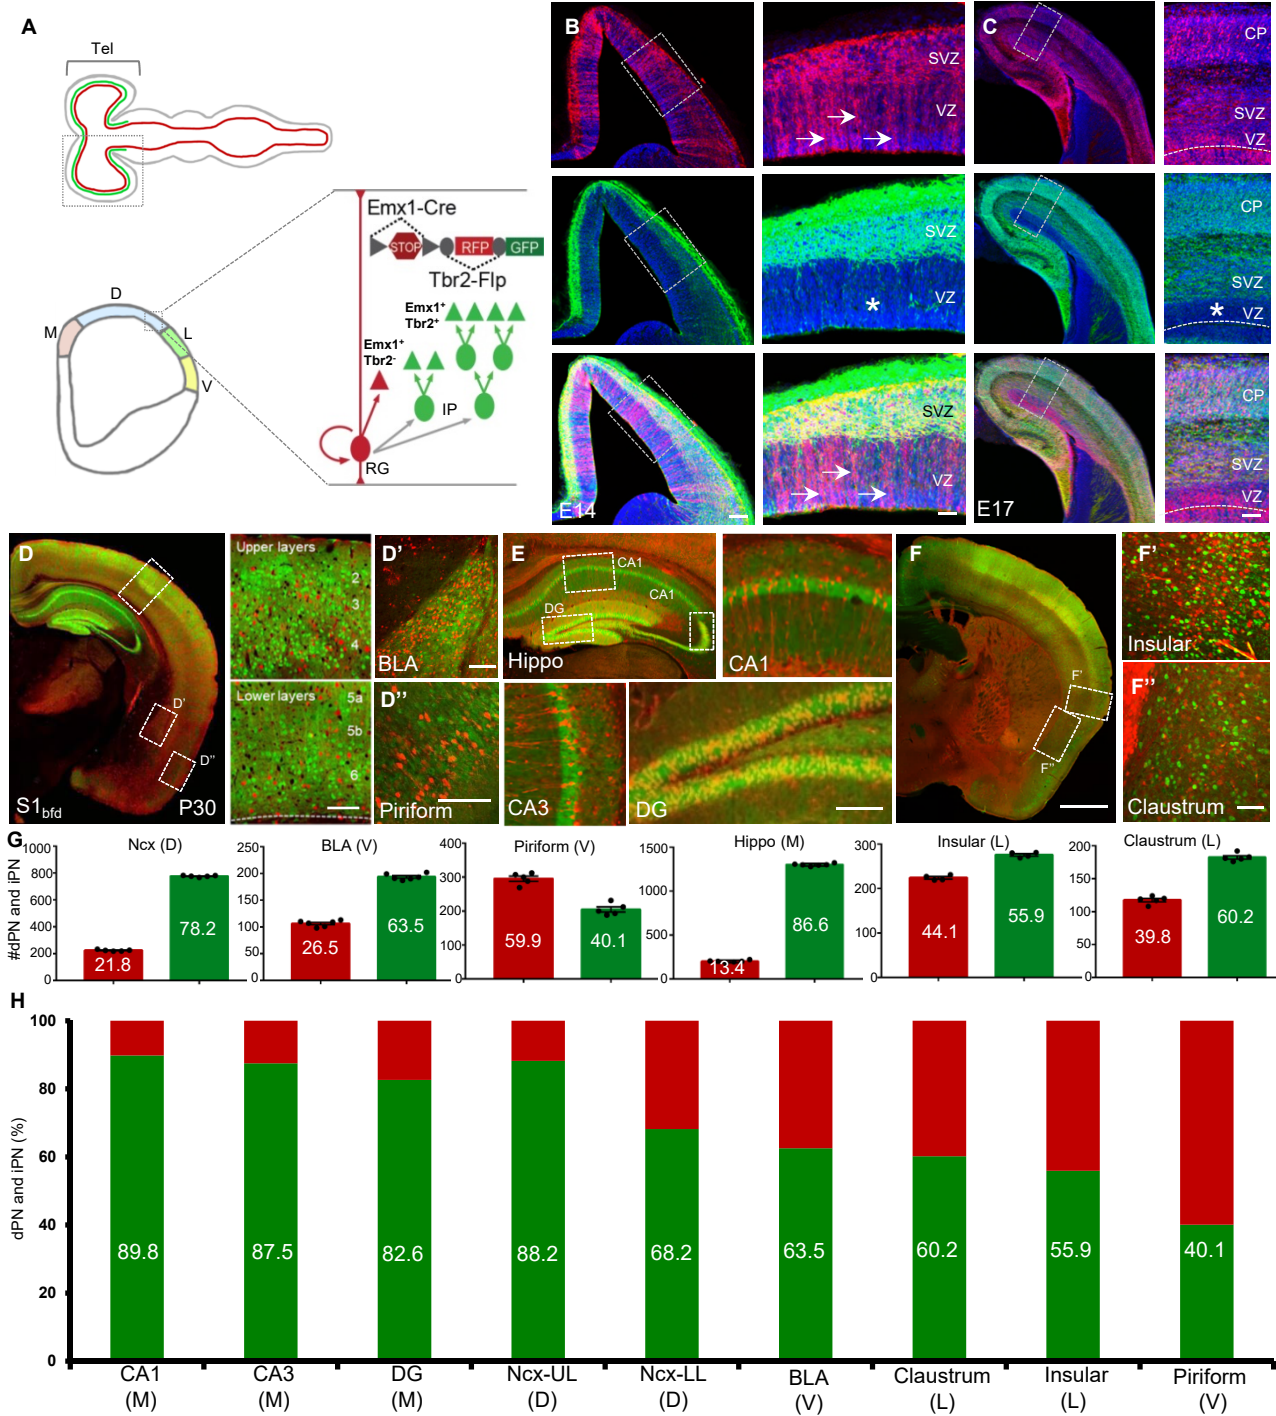

## Figure 2\_Huilgol

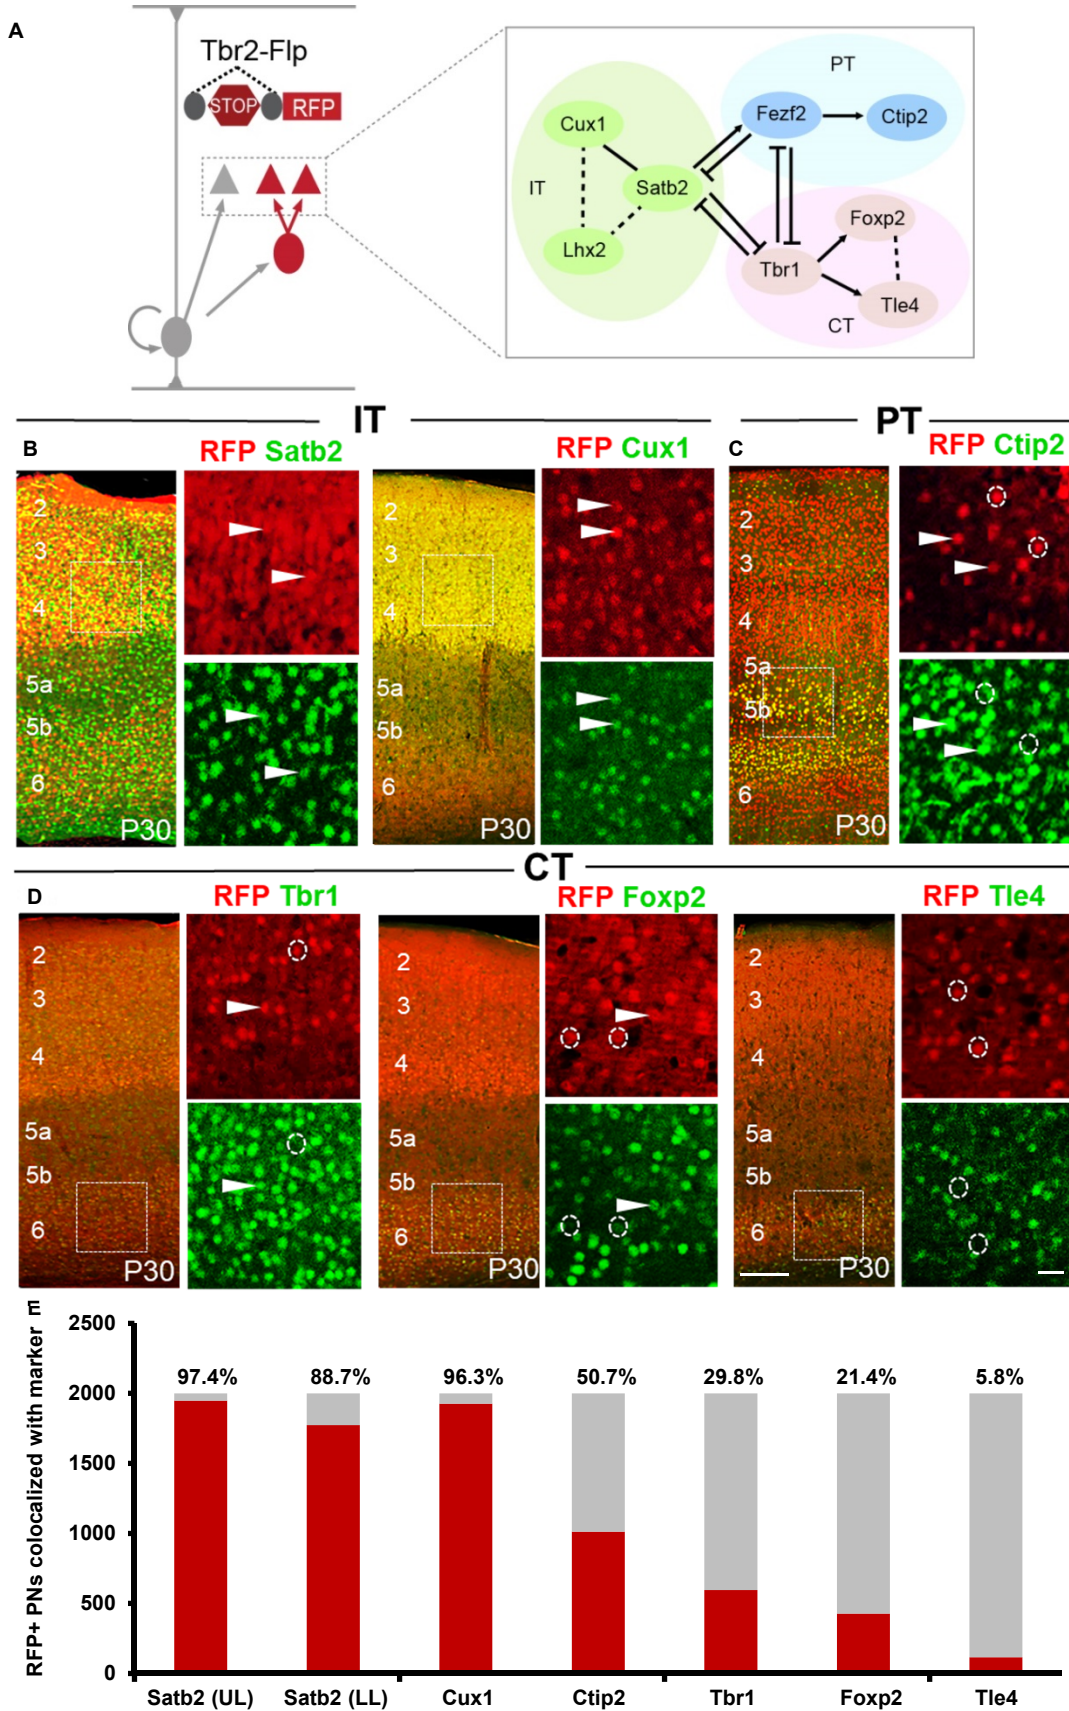

## Figure 3\_Huilgol

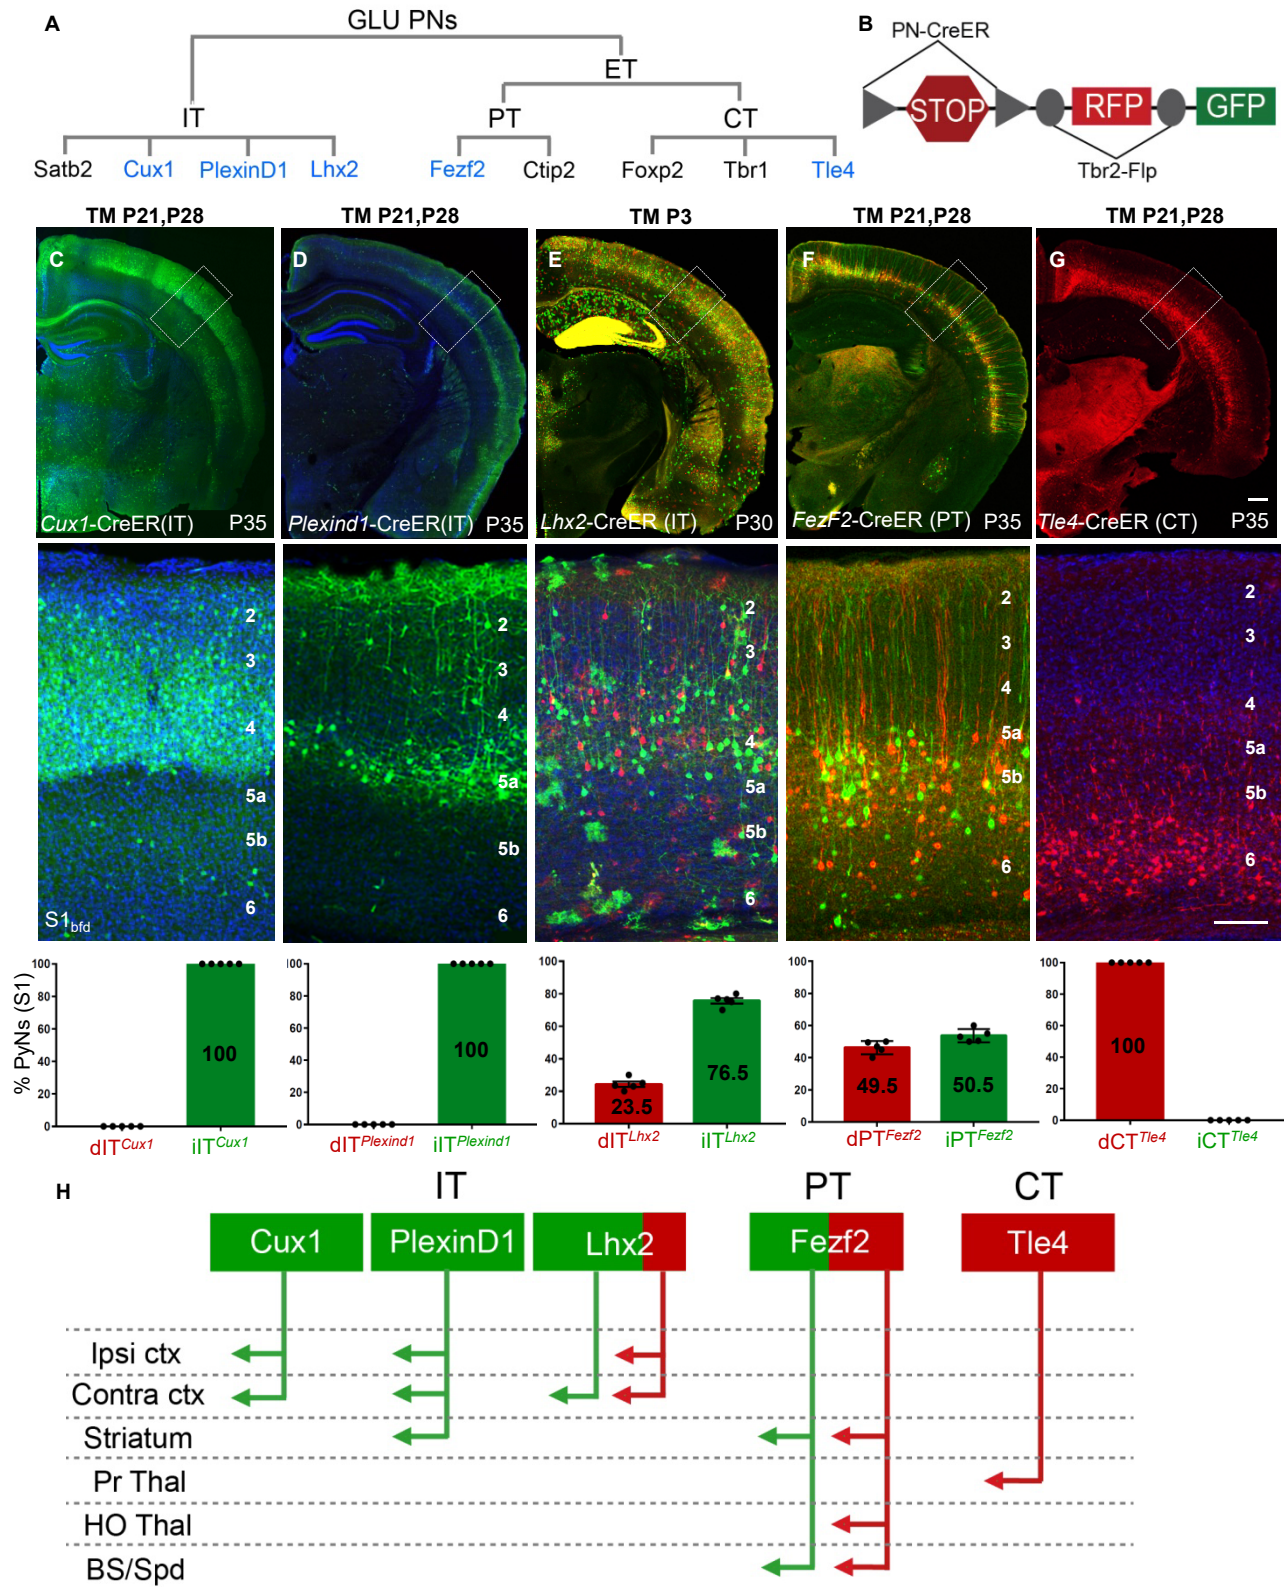

## Figure 4\_Huilgol

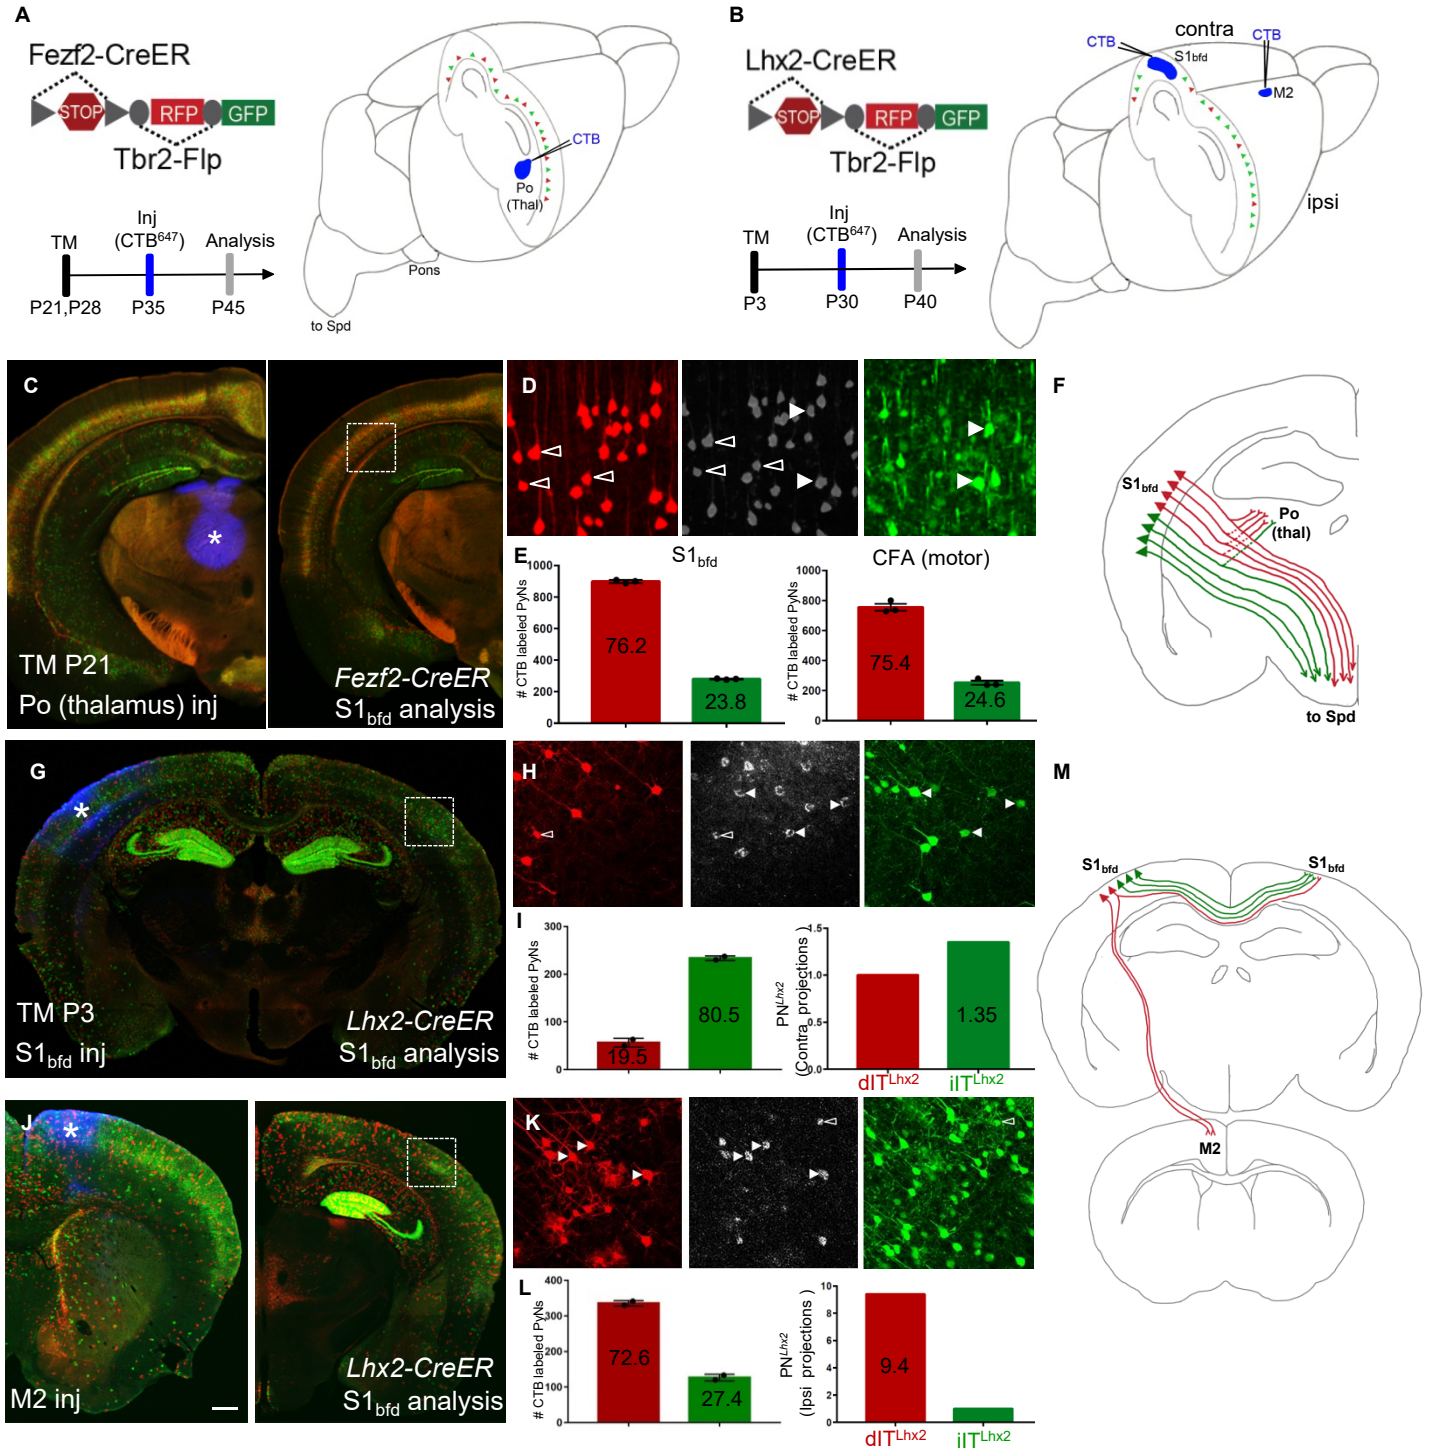

## Figure 5\_Huilgol

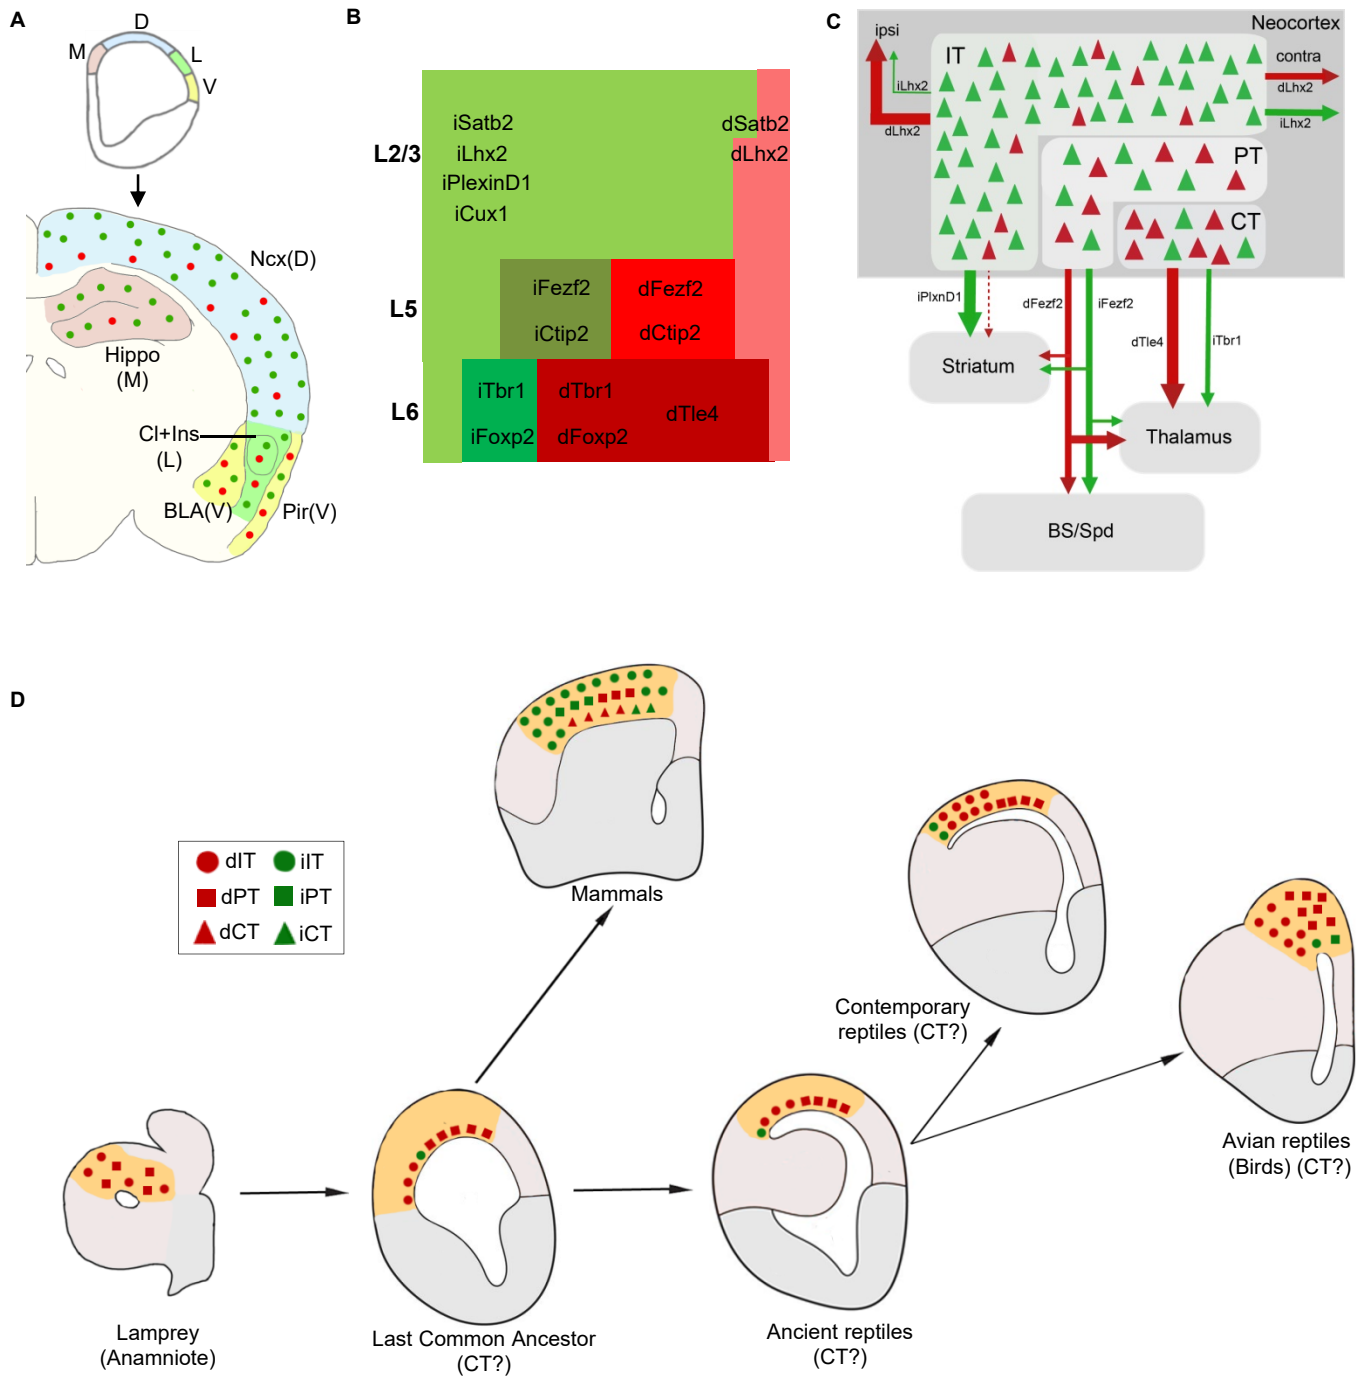

## SUPPLEMENTARY FIGURE LEGENDS

### Supp Fig 1: *Tbr2-2A-Flp* captures IPs producing all major cortical PyN classes

(A) Genetic strategy using *Tbr2-2A-Flp* and a *Flp*-dependent reporter to label all IPs and their progeny. (B) E10.5 *Tbr2* coronal hemisection labels IPs (arrowheads, B', B'') in the pallial neuroepithelium. (C) Quantification shows IPs constitute 95.9% of progenitors, with sparsely labeled RG-like cells (arrows, B'). (D) P30 coronal hemisection labels PNs across cortical laminae in upper (UL) and lower layers (LL) (high magnification, right). (E) Anterior coronal section reveals that iPNS project across the corpus callosum (E'; arrows) and to the striatum (E''; arrows). (F) Sagittal section shows cellular RFP expression restricted largely to cortical structures. iPNS project to the pons (F') and along the pyramidal tract (PT, F'', F'''). (G) High magnification view of (D) reveals iPNS axons labeled in the thalamus. Quantification in (C) was done from 70-100 cells in 5 embryos each, 2 litters. Ventricle and marginal zone indicated by dashed lines (B', B''). Scale bars, high mag, 100µm; low mag 20µm (B), 1mm (D,E,F), 200µm (all other scale bars). Abbreviations: RG, radial glial cell; IP, intermediate progenitor; VZ, ventricular zone; SVZ, subventricular zone; IT, intratentorial, PT, pyramidal tract; CT, corticothalamic; S1<sub>bfd</sub>, primary somatosensory barrel field cortex; UL, upper layer; LL, lower layer. Related to Figure 1.

### Supp Fig 2: dNG and iNG generate all major classes of PNs in the neocortex

(A) IS strategy in combination with *Emx1-Cre* and *Tbr2-Flp* to label dPNs (RFP) and iPNS (GFP) in the neocortex (also see Fig.1). (B) Quantification showing the distribution of dPNs in UL (58%) and LL (48%) as well as iPNS in UL (64%) and LL (36%) in S1<sub>bfd</sub> of the neocortex. (C) Fate mapped PNs<sup>Emx1</sup> from dNG and iNG are present across all cortical laminae (high magnification, right). (D) Both dPNs (D') and iPNS (D'') in the neocortex project to all major cortical and subcortical targets: across the corpus callosum, striatum (IT); superior colliculus, pons (PT) and the thalamic nuclei (CT). 1000 cells were counted in 5 mice, data are mean ± SEM (B,C). Scale bars, 1mm (B), 200µm (all other scale bars). Abbreviations: UL, upper layers (layers 2-4); LL, lower layers (layers 5-6); S1<sub>bfd</sub>, primary somatosensory barrel field cortex; RG, radial glial cell; IP, intermediate progenitor. Related to Figure 1.

### Supp Fig 3: Control for IS reporter functionality to confirm that PNs<sup>PlxnD1</sup> are iNG derived and PNs<sup>Tle4</sup> are dNG derived

(A) Schematic of *AAV-Cre* injection in S1<sub>bfd</sub> of an adult *PlxnD1-CreER;Tbr2-lp;IS* mice. (B) Whereas *PlxnD1-CreER* activated GFP expression in IP<sup>Tbr2</sup>-derived PNs, a generic CMV promoter-driven AAV-Cre activated RFP expression in S1<sub>bfd</sub>, indicating that the RFP cassette is intact in the IS reporter. (C) Schematic of *AAV-Flp* injection in layer 6 in S1<sub>bfd</sub> of *Tle4-CreER;Tbr2-Flp;IS* mice. (D) Whereas *Tle4-CreER* activated RFP expression, a generic CMV promoter-driven AAV-Flp activated RFP expression in layer 6 of S1<sub>bfd</sub>, indicating that the GFP cassette is intact in the IS reporter. Scale bars 1mm (low mag); 100µm (high mag). IT, intratentorial, CT, corticothalamic. Related to Figure 3.

### Supp Fig 4: dNG and iNG contribute differentially to PNs<sup>Fezf2</sup> and PNs<sup>Lhx2</sup> in cortical structures



(A) P21-induced *Fezf2-CreER; Tbr2-flp; IS* coronal hemisection shows differential labeling of dNG and iNG derived PNs<sup>Fezf2</sup> in different cortical structures at P35. (B) In the BLA, 42.9% PNs<sup>Fezf2</sup> are dNG-derived and 57.1% are iNG-derived. (C) 48.8% subiculum PNs<sup>Fezf2</sup> are born via dNG and 51.2% are iNG-generated. (D) The sparsely labeled DG shows a distribution of 49.1% dNG-derived and 50.9% iNG-derived PNs<sup>Fezf2</sup>. (E) *Lhx2-CreER; Tbr2-Flp; IS* induced at P3 labels the DG. (F) PNs<sup>Lhx2</sup> are produced via both dNG (RFP) and iNG (GFP), as seen from the higher magnification DG images. (G) Quantification reveals dNG and iNG in the DG are distributed 47.5% and 52.5% respectively. For quantifications, 6-10 sections each from 5 animals were counted. Data are mean  $\pm$  SEM. Scale bars, 1mm (A,E); 200 $\mu$ m (B,C,D,F). Abbreviations: BLA, basolateral amygdala; DG, dentate gyrus. Related to Figures 3,4.

### Supp Fig 5: dPNs<sup>Fezf2</sup> and iPNs<sup>Fezf2</sup> project to the spinal cord and striatum in near equal proportions

(A) (Top) *Fezf2-CreER; Tbr2-Flp; IS* strategy to label dPNs (RFP) and iPNs (GFP). (Bottom) Experimental scheme shows TM induction at P21 to label PNs<sup>Fezf2</sup>, followed by CTB<sup>647</sup> injection at P35 to retrogradely label projection targets. Brains were analyzed at P45. (B) dPNs<sup>Fezf2</sup> and iPNs<sup>Fezf2</sup> both project to the striatum, the spinal cord and the thalamus. (C) CTB was injected in the cervical spinal cord, C1-C4 segments (asterisk). (D) Analysis in S1<sub>bfd</sub> to quantify CTB colocalization with dPNs<sup>Fezf2</sup> (arrowheads, RFP) and iPNs<sup>Fezf2</sup> (open arrowheads, GFP). (E) CTB injection in the striatum (asterisk). (F) Similar co-localization analysis as in (D). (G) (Left) Quantification spinal cord CTB injection shows colocalization with 47.9% dPNs<sup>Fezf2</sup> and 52.1% iPNs<sup>Fezf2</sup>. (Right) CTB injection in the striatum shows colocalization with 49.1% dPT<sup>Fezf2</sup> and 50.9% iPT<sup>Fezf2</sup>. For quantification,  $\sim$ 1000 cells were counted from 5 animals each. Data are mean  $\pm$  SEM. Scale bars, 1mm (C,E); 200 $\mu$ m (B); 100 $\mu$ m (D,F). Abbreviations: S1<sub>bfd</sub>, primary somatosensory barrel field cortex; Inj, injection; TM, tamoxifen induction; Related to Figure 4.

### Supp Fig 6: dPNs<sup>Lhx2</sup> project preferentially to ipsilateral cortical areas

(A) (Top) *Lhx2-CreER; Tbr2-Flp; IS* strategy to label dPNs (RFP) and iPNs (GFP). (Bottom) Experimental paradigm with TM induction at P3 to label PNs<sup>Lhx2</sup>, followed by CTB injection at P30. The brains were analyzed at P40. (B) The corpus callosum shows projections from both dPNs<sup>Lhx2</sup> and iPNs<sup>Lhx2</sup> at anterior (aCC) and posterior (pCC) levels. (C) PNs<sup>Lhx2</sup> project sparsely to the striatum. (D) Several cortical areas were analyzed for heterotypic contralateral projections when injected in contraS1<sub>bfd</sub> from PNs<sup>Lhx2</sup>: ipsiM1, ipsiM2, ipsiS1<sub>fl</sub>, ipsiRsp and ipsiV1 (E) Quantification in ipsiM1 (top) shows that CTB colocalizes with 24.2% dPNs<sup>Lhx2</sup> and 75.8% iPNs<sup>Lhx2</sup> ( $\sim$ 400 cells). (Bottom) Normalization to the total PNs<sup>Lhx2</sup> labeled reveals similar projections (1.04-fold difference) from dPNs and iPNs. (F) (Top) Analysis in ipsiM2 reveals CTB colocalization with 28.5% dPNs<sup>Lhx2</sup> and 71.5% iPNs<sup>Lhx2</sup> ( $\sim$ 90 cells). (Bottom) Normalizing values to the number of PNs<sup>Lhx2</sup> shows similar projections (1.3-fold difference) between dPNs and iPNs. (G) (Top) CTB colocalizes with 29.1% dPNs<sup>Lhx2</sup> and 70.9% iPNs<sup>Lhx2</sup> in V1 ( $\sim$ 120 cells). (Bottom) There are similar projections (1.32-fold difference) from dPNs and iPNs upon normalization. No colocalization seen in ipsiS1<sub>fl</sub> and ipsiRSp (H) ipsiM1, contraM1 and ipsiS1<sub>fl</sub> were analyzed for projections to M2. (I) Analysis in contraM1 shows colabeling with 19.4% dPNs<sup>Lhx2</sup> and 80.6% iPNs<sup>Lhx2</sup> (top,  $\sim$ 200 cells) with no difference (1.28-fold) between dPNs<sup>Lhx2</sup> and iPNs<sup>Lhx2</sup> (bottom). (J) ipsiM1 (top) shows that CTB colabels with 85.6% dPNs<sup>Lhx2</sup> and 14.4% iPNs<sup>Lhx2</sup> ( $\sim$ 300 cells) showing 12-fold higher projections from dPNs<sup>Lhx2</sup> (bottom).

(K) Quantification in ipsiS1<sub>fl</sub> shows colocalization with 73.8% dPNs<sup>Lhx2</sup> and 26.2% iPNs<sup>Lhx2</sup> (top, ~500 cells) resulting in 9.23-fold higher projections from dPNs<sup>Lhx2</sup> (bottom).

Quantification was done from 3-4 animals each. Data are mean  $\pm$  SEM. Scale bars, 200um (A,B); 1mm (D,H). Abbreviations: Inj, injection; TM, tamoxifen induction; aCC, anterior corpus callosum; pCC, posterior corpus callosum; ipsiM1, ipsilateral primary motor cortex; ipsiM2; ipsilateral secondary motor cortex; ipsiS1<sub>Fl</sub>, ipsilateral primary somatosensory forelimb cortex; ipsiRSp, ipsilateral retrosplenial cortex; ipsiV1, ipsilateral primary visual cortex; contraM1, contralateral primary motor cortex. Related to Figure 4.

## Supp Fig 1\_Huilgol

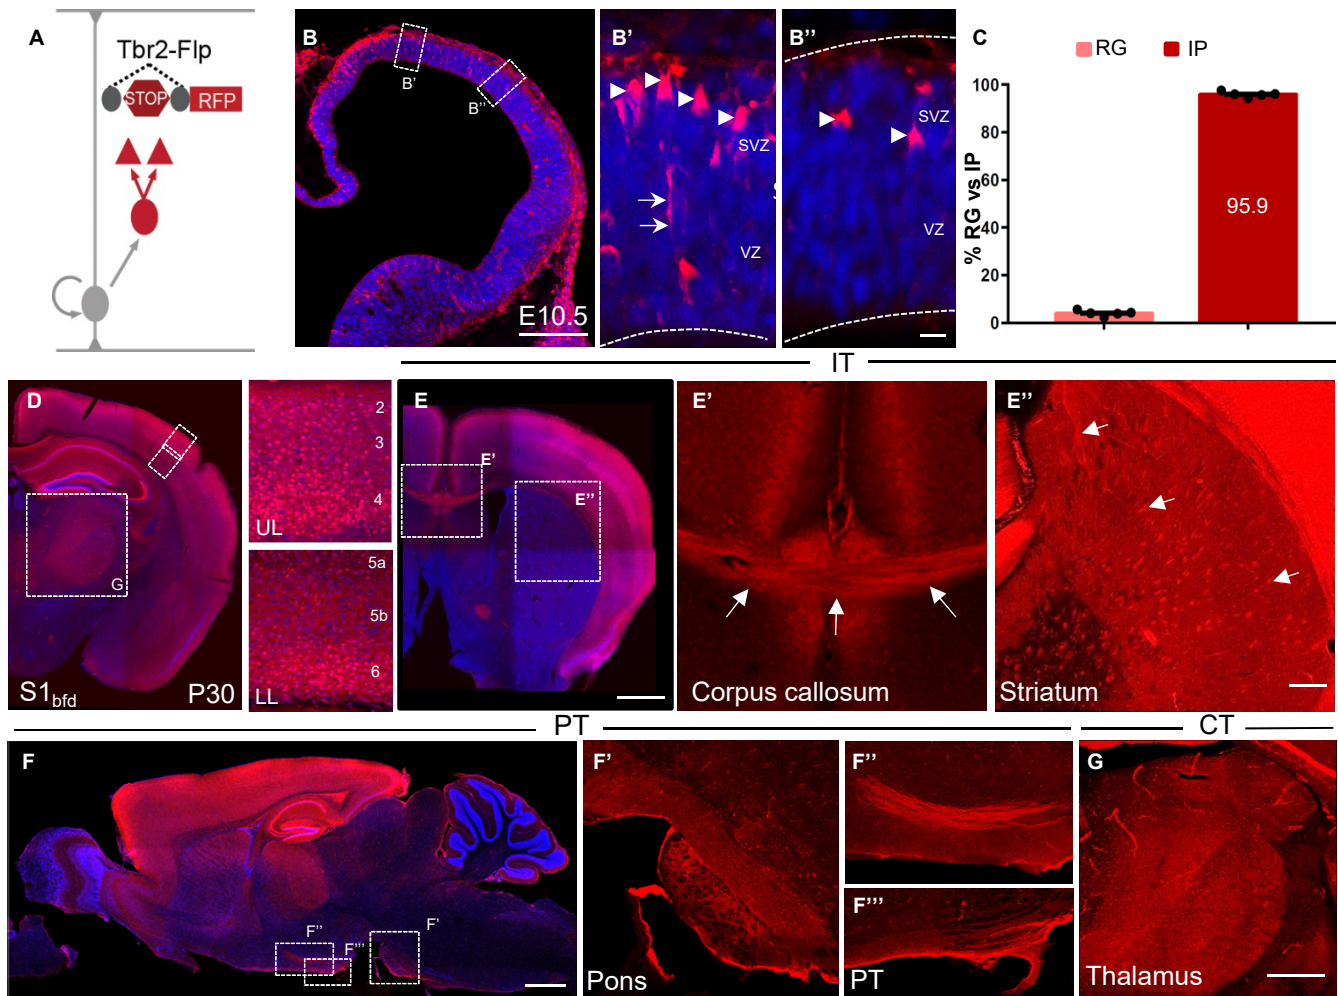

## Supp Fig 2\_Huilgol

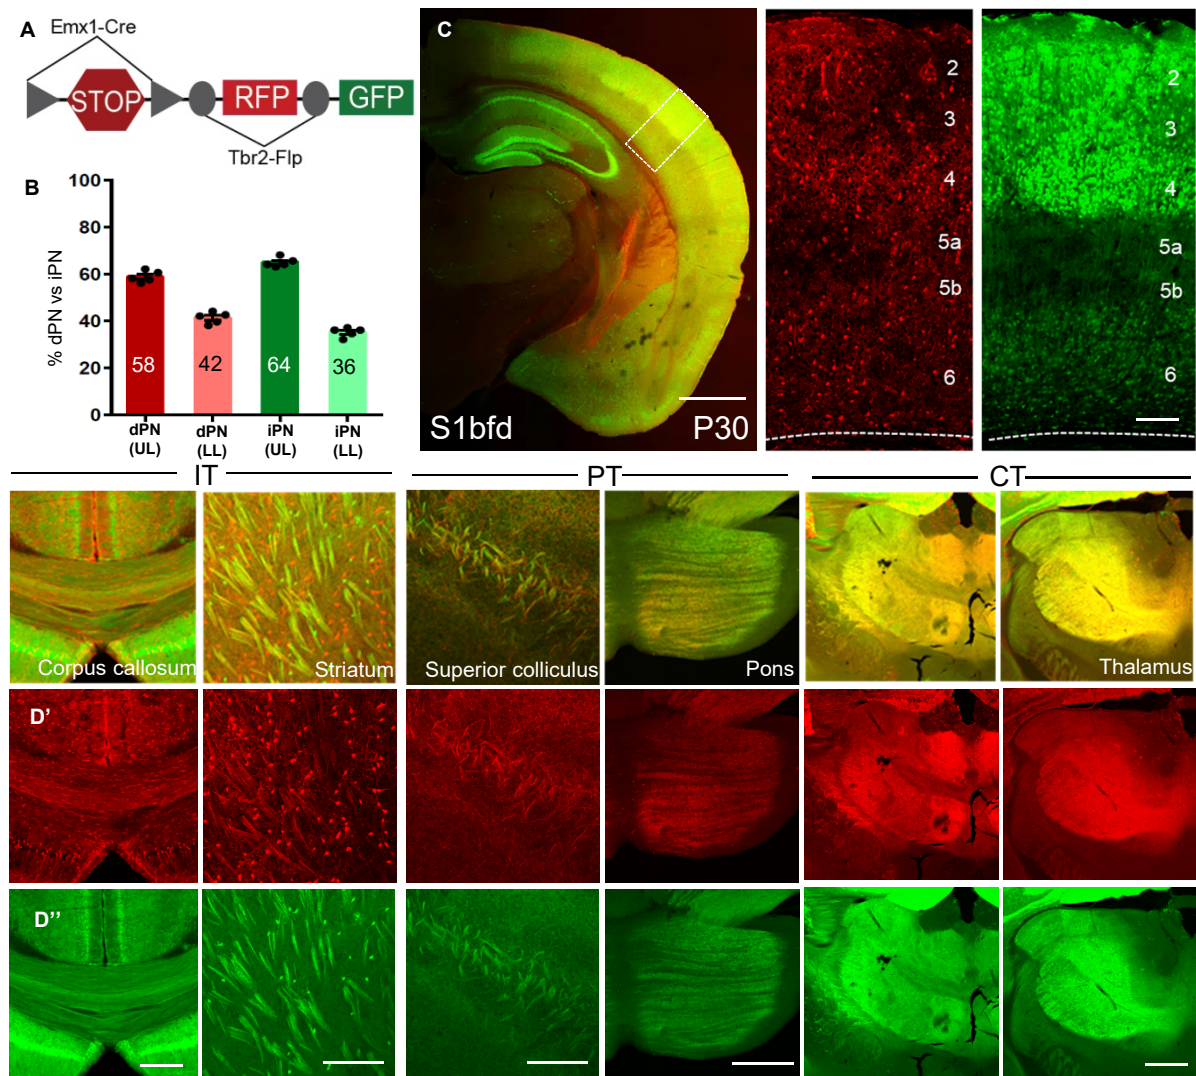

## Supp Fig 3\_Huilgol

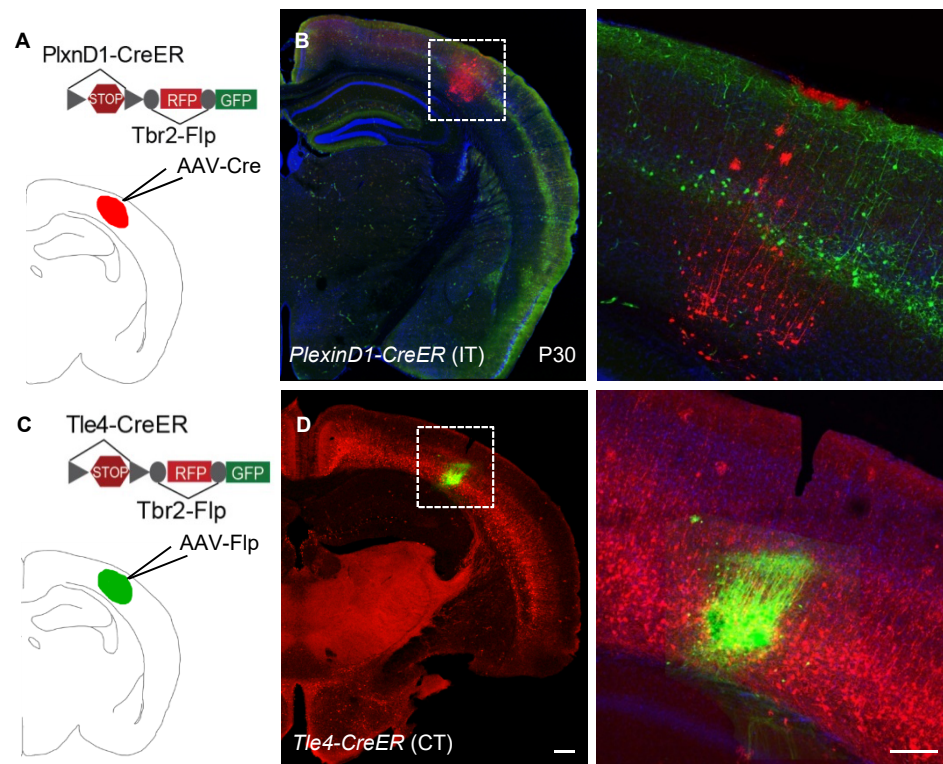

## Supp Fig 4\_Huilgol

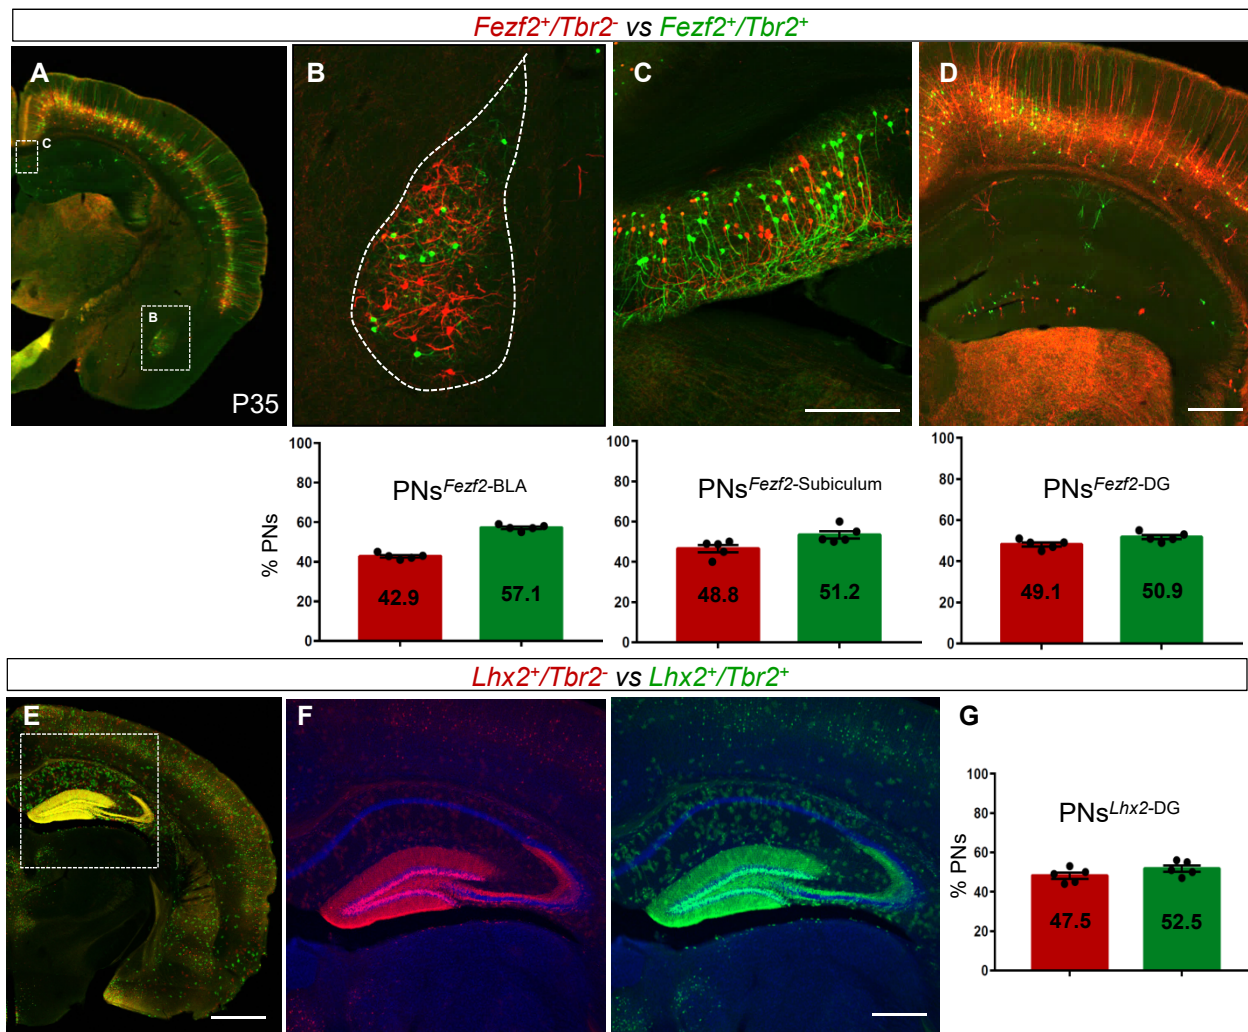

## Supp Fig 5\_Huilgol

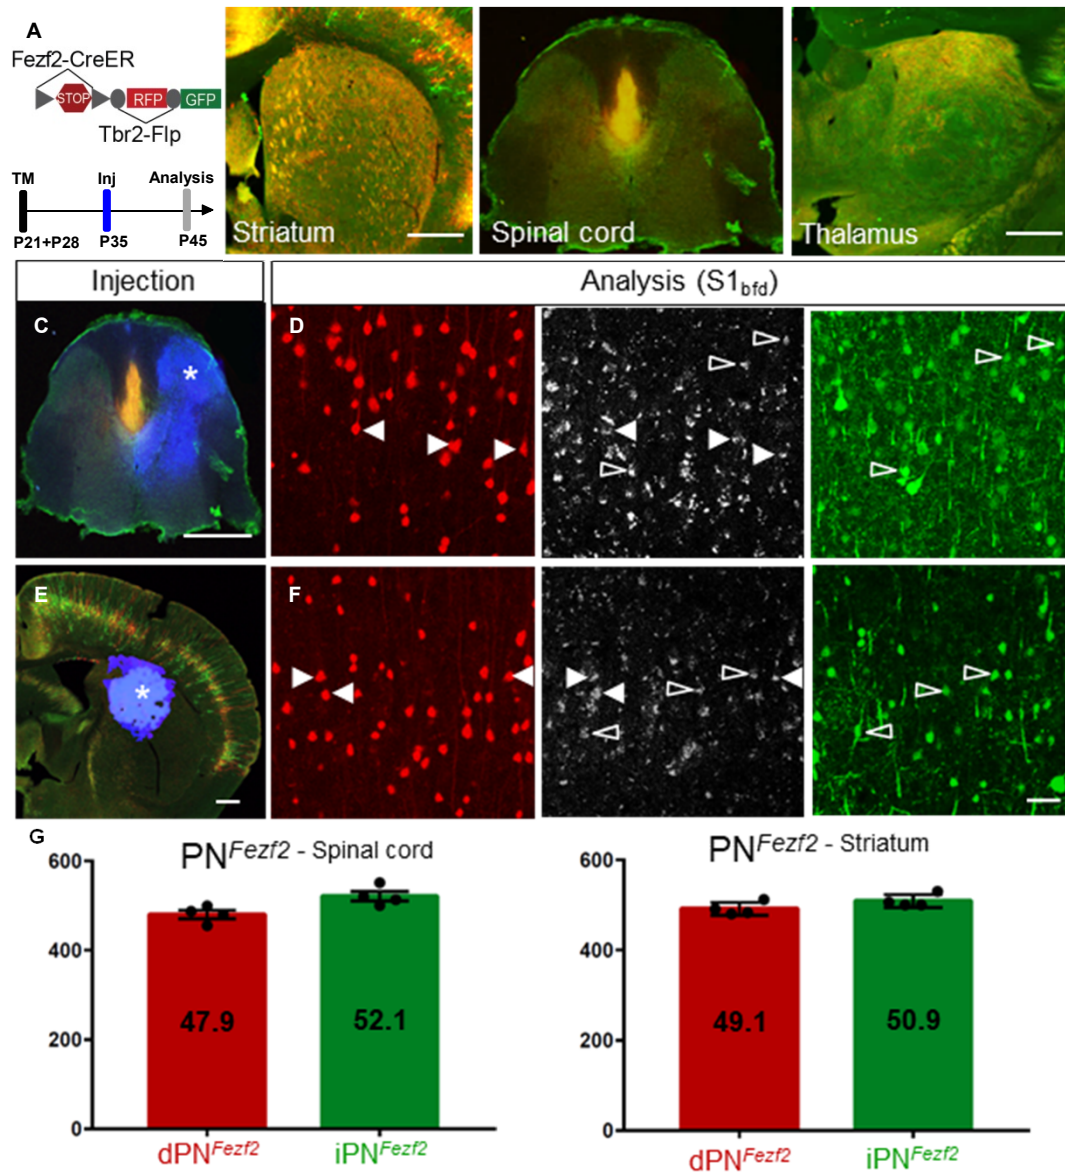

## Supp Fig 6\_Huilgol

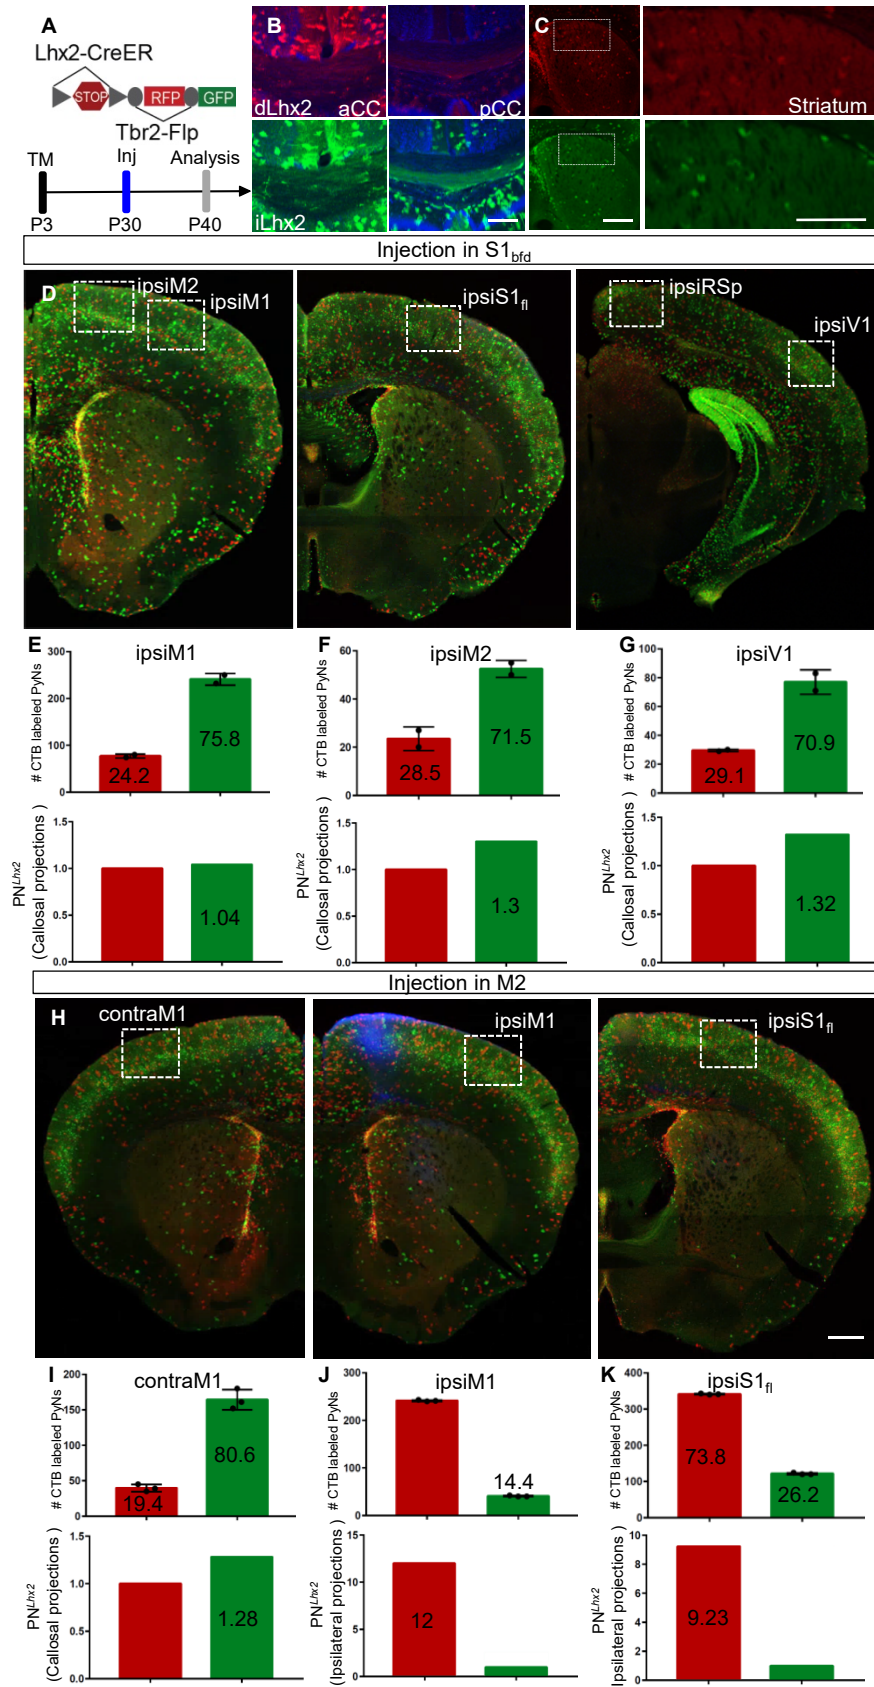

Source: https://www.biorxiv.org/content/10.1101/2022.03.13.484161v1.full.pdf
